1 **Nsp1 proteins of human coronaviruses HCoV-OC43 and SARS-CoV2 inhibit stress granule**  
2 **formation**

3 Stacia M. Dolliver<sup>1</sup>, Mariel Kleer<sup>2,3</sup>, Maxwell P. Bui-Marinos<sup>2,3</sup>, Shan Ying<sup>1</sup>, Jennifer A. Corcoran<sup>2,3</sup>, and  
4 Denys A. Khapersky<sup>1,#</sup>

5  
6 <sup>1</sup>Department of Microbiology & Immunology, Dalhousie University, 5850 College Street, Halifax NS,  
7 Canada B3H 4R2

8 <sup>2</sup>Department of Microbiology, Immunology and Infectious Diseases, University of Calgary, 2500  
9 University Drive NW, Calgary AB, Canada T2N 1N4

10 <sup>3</sup>Snyder Institute for Chronic Diseases and Charbonneau Institute for Cancer Research, University of  
11 Calgary, Calgary AB, Canada T2N 1N4

12

13 #Corresponding author: [d.khapersky@dal.ca](mailto:d.khapersky@dal.ca)

14

15 Running Title: Stress granule inhibition by SARS-CoV2 and HCoV-OC43

16

17 Keywords: coronavirus, stress granule, host shutoff, SARS-CoV-2, HCoV-OC43, nucleoprotein, Nsp1,  
18 eIF2 $\alpha$ , G3BP1, TIAR

19

20 **Abstract**

21

22 Stress granules (SGs) are cytoplasmic condensates that often form as part of the cellular antiviral  
23 response. Despite the growing interest in understanding the interplay between SGs and other biological  
24 condensates and viral replication, the role of SG formation during coronavirus infection remains poorly  
25 understood. Several proteins from different coronaviruses have been shown to suppress SG formation

26 upon overexpression, but there are only a handful of studies analyzing SG formation in coronavirus-  
27 infected cells. To better understand SG inhibition by coronaviruses, we analyzed SG formation during  
28 infection with the human common cold coronavirus OC43 (HCoV-OC43) and the highly pathogenic  
29 SARS-CoV2. We did not observe SG induction in infected cells and both viruses inhibited eukaryotic  
30 translation initiation factor 2 $\alpha$  (eIF2 $\alpha$ ) phosphorylation and SG formation induced by exogenous stress  
31 (e.g. sodium arsenite treatment). Furthermore, in SARS-CoV2 infected cells we observed a sharp  
32 decrease in the levels of SG-nucleating protein G3BP1. Ectopic overexpression of nucleocapsid (N) and  
33 non-structural protein 1 (Nsp1) from both HCoV-OC43 and SARS-CoV-2 inhibited SG formation. The  
34 Nsp1 proteins of both viruses inhibited arsenite-induced eIF2 $\alpha$  phosphorylation, and the Nsp1 of SARS-  
35 CoV2 alone was sufficient to cause decrease in G3BP1 levels. This phenotype was dependent on the  
36 depletion of cytoplasmic mRNA mediated by Nsp1 and associated with nuclear retention of the SG-  
37 nucleating protein TIAR. To test the role of G3BP1 in coronavirus replication, we infected cells  
38 overexpressing EGFP-tagged G3BP1 with HCoV-OC43 and observed a significant decrease in infection  
39 compared to control cells expressing EGFP. The antiviral role of G3BP1 and the existence of multiple SG  
40 suppression mechanisms that are conserved between HCoV-OC43 and SARS-CoV2 suggest that SG  
41 formation may represent an important antiviral host defense that coronaviruses target to ensure efficient  
42 replication.

### 43 **Author Summary**

44 Host cells possess many mechanisms that can detect viral infections and trigger defense programs to  
45 suppress viral replication and spread. One of such antiviral mechanisms is the formation of stress granules  
46 – large aggregates of RNA and proteins that sequester viral components and cellular factors needed by the  
47 virus to replicate. Because of this threat, viruses evolved specific mechanisms that prevent stress granule  
48 formation. Understanding these mechanisms can reveal potential targets for therapies that would disable  
49 viral inhibition of stress granules and render cells resistant to infection. In this study we analyzed  
50 inhibition of stress granules by two human coronaviruses: the common cold coronavirus OC43 and the

51 pandemic SARS-CoV2. We have demonstrated that these viruses employ at least two proteins –  
52 nucleocapsid protein (N) and the non-structural protein 1 (Nsp1) to suppress stress granules. These  
53 proteins act through distinct complementary mechanisms to ensure successful virus replication. Because  
54 both OC43 and SARS-CoV2 each dedicate more than one gene product to inhibit stress granule  
55 formation, our work suggests that viral disarming of stress granule responses is central for a productive  
56 infection.

## 57 **Introduction**

58 Coronaviruses are a family of human and animal enveloped viruses with positive-sense RNA genomes. In  
59 humans, coronaviruses predominantly cause respiratory infections of varied severity. Four circulating  
60 seasonal common cold coronaviruses (HCoV) belong to Alphacoronavirus and Betacoronavirus genera  
61 and include HCoV-NL63, HCoV-229E, HCoV-HKU1, and HCoV-OC43 (1). In the last two decades,  
62 three novel Betacoronaviruses have entered human circulation from zoonotic sources and caused  
63 infections with high morbidity and mortality. This group includes the severe acute respiratory syndrome  
64 coronavirus (SARS-CoV), the Middle East respiratory syndrome coronavirus (MERS-CoV), and the  
65 SARS-CoV2 virus that appeared in late 2019 and caused the most devastating respiratory virus pandemic  
66 since the 1918 Spanish Flu (2–5).

67  
68 The relatively genomes of Betacoronaviruses are ~30 kb and encode 4-5 structural proteins and 16 non-  
69 structural proteins (Nsp1-16) (1,6–8). The non-structural proteins are synthesized from capped and  
70 polyadenylated genomic RNA as a polyprotein encoded by a large open reading frame (ORF), ORF1ab.  
71 This polyprotein is proteolytically processed into mature proteins by two viral enzymes: Nsp3 papain-like  
72 proteinase (PLpro) and Nsp5 3C-like proteinase (3CLpro) (1,9). Non-structural proteins include factors  
73 that enable viral replication in the host cell and the subunits of the RNA-dependent RNA polymerase (6).  
74 Structural proteins are encoded by a nested set of subgenomic mRNAs produced by viral polymerase.  
75 These subgenomic mRNAs also encode a variable number of smaller accessory ORFs depending on the

76 virus species (8). Structural proteins include membrane (M), envelope (E), nucleocapsid (N), and spike  
77 (S). Of these, M and E are responsible for virus particle formation, N is an RNA-binding protein that  
78 packages viral genomes into virions, and S is the receptor binding glycoprotein that protrudes from the  
79 virion envelope and mediates membrane fusion and viral entry (10). HCoV-OC43 (OC43) S binds sialic  
80 acid that is abundant on the surface of most cell types (11), while SARS-CoV and SARS-CoV2 (CoV2) S  
81 bind angiotensin converting enzyme 2 (ACE2), determining viral tropism for the ACE2-expressing cells  
82 (12,13).

83

84 Once virus enters a host cell, its genome associates with host translation machinery to initiate synthesis of  
85 viral proteins involved in subgenomic mRNA production, genome replication, and subversion of intrinsic  
86 host antiviral responses (14). Cytoplasmic replication of coronaviruses can generate double-stranded  
87 RNA (dsRNA) intermediates that are important pathogen-associated molecular patterns (PAMPs) sensed  
88 by the host cell (14,15). Coronavirus dsRNA is believed to be shielded in membrane bound replication  
89 transcription compartments to limit activation of cytosolic sensors (1,8). This mechanism, however, is  
90 insufficient to fully prevent viral dsRNA sensing, because when other mechanisms of suppression of  
91 intrinsic antiviral responses are inactivated, antiviral responses are induced in coronavirus-infected cells  
92 (16,17). The retinoic acid inducible gene I (RIG-I) and melanoma differentiation-associated protein 5  
93 (MDA5) can detect viral RNAs and signal to transcriptionally induce antiviral cytokines such as type I  
94 and type III interferons (15,18,19). In addition, viral replication intermediates can be recognized in  
95 cytosol by the dsRNA activated protein kinase (PKR) - one of the four kinases that can trigger inhibition  
96 of protein synthesis by phosphorylation of the  $\alpha$  subunit of the eukaryotic translation initiation factor 2  
97 (eIF2 $\alpha$ ) (20). When eIF2 $\alpha$  is phosphorylated, it stably associates with the guanine exchange factor eIF2B,  
98 preventing regeneration of translation initiation-competent GTP-bound form of eIF2 (21). This blocks  
99 translation initiation and, since viruses rely on host translation for their protein synthesis, it can block  
100 viral replication. In addition, inhibition of translation initiation can induce formation of stress granules  
101 (SGs) (22–24).



102

103 SGs are large cytoplasmic condensates that accumulate translationally inactive messenger  
104 ribonucleoprotein complexes and dozens of proteins and other molecules (23,24). SG condensation is  
105 driven by the SG-nucleating proteins like the Ras-GTPase-activating protein SH3-domain-binding protein  
106 1 (G3BP1), G3BP2, T-cell internal antigen 1 (TIA-1) and T-cell internal antigen related (TIAR) (23–26).  
107 In addition to these and other SG-nucleating proteins, SG condensates accumulate mRNAs and translation  
108 initiation factors. In virus-infected cells, SGs may sequester viral RNAs and proteins to either disrupt  
109 their functions in the virus replication cycle or to facilitate detection of viral RNA by PAMP sensors (e.g.  
110 RIG-I) (27–31). Thus, accumulating evidence indicates that SGs are antiviral, and many viruses evolved  
111 dedicated mechanisms that inhibit their formation (32).

112

113 Several coronavirus gene products have been reported to inhibit SG formation. Of these, the most well  
114 characterized is the N protein of CoV2 that upon ectopic overexpression, directly binds G3BP1 protein  
115 and blocks SG formation induced by variety of exogenous stressors (33–35). In addition, Nsp15 protein  
116 of infectious bronchitis virus (IBV) was shown to inhibit SG formation (17). Nsp15 is a nuclease that is  
117 conserved in coronaviruses. It preferentially cleaves polyuridine RNA sequences and inhibits  
118 accumulation and detection of viral dsRNA in infected cells (36).

119

120 Another viral protein that was shown to affect SG formation is Nsp1, a host shutoff factor encoded by the  
121 first N-terminal portion of ORF1ab of betacoronaviruses (37). Nsp1 functions primarily through  
122 inhibition of host protein synthesis by binding to the 43S small ribosomal subunit complex and blocking  
123 the mRNA entry channel of the mature 80S ribosome (37–39). In addition, Nsp1 proteins of SARS-CoV  
124 and CoV2 induce host mRNA degradation by a yet to be identified host nuclease (40–42). Upon ectopic  
125 overexpression, SARS-CoV Nsp1 was shown to interact with G3BP1 and modify composition of sodium  
126 arsenite (As) induced SGs by diminishing G3BP1 recruitment (43). G3BP1 and other SG nucleating  
127 proteins drive SG formation by interacting with polysome-free messenger ribonucleoproteins that

128 accumulate after inhibition of translation initiation. Therefore, in theory, inhibition of translation initiation  
129 by Nsp1 could promote SG formation by causing polysome disassembly. At the same time, host mRNA  
130 degradation could deplete untranslated mRNAs and inhibit SG formation, and we have shown previously  
131 that the influenza A virus host shutoff endonuclease PA-X can potently inhibit SG formation through this  
132 mechanism (31). Which of the two Nsp1 host shutoff features is more dominant in modulating SGs and  
133 how Nsp1 proteins that do not induce mRNA degradation affect SG formation has not been tested to date.

134

135 Given the proposed antiviral functions of SG formation and the multiple proposed mechanisms that  
136 betacoronaviruses employ to block SG formation and modify their composition, we aimed at  
137 characterizing SG inhibition mechanisms by the model common cold betacoronavirus OC43. We  
138 compared SG inhibition by this virus and the highly pathogenic CoV2 in the same cell culture infection  
139 model to identify potential common strategies and/or differences in the magnitude and molecular  
140 mechanisms of SG inhibition. In this work we demonstrate that both OC43 and CoV2 efficiently inhibit  
141 SG formation in infected cells and show that N and Nsp1 proteins of both viruses act through distinct  
142 mechanisms to inhibit SG formation. N proteins of OC43 and CoV2 act independent from eIF2 $\alpha$   
143 phosphorylation and downstream of translation arrest, while Nsp1 proteins block SG formation by  
144 inhibiting eIF2 $\alpha$  phosphorylation upstream of SG nucleation. In addition, CoV2 but not OC43 infection  
145 causes depletion of G3BP1 and disrupts nucleocytoplasmic shuttling of TIAR, which contributes to more  
146 potent inhibition of SG formation by this virus. We demonstrate that the CoV2 Nsp1-mediated host  
147 shutoff is responsible, at least in part, for depletion of G3BP1 and nuclear accumulation of TIAR.  
148 Specifically, the mRNA degradation function was required for these phenotypes. When we overexpressed  
149 G3BP1, it significantly decreased OC43 infection, illustrating that G3BP1 is antiviral towards  
150 coronaviruses. Our study reveals that both OC43 and CoV2 each dedicate more than one gene product to  
151 inhibit SG formation, a genetic redundancy that supports that viral disarming of SG responses is central  
152 for a productive infection.

153

154 **Results**

155

156 **Human coronavirus OC43 inhibits SG formation in infected cells.**

157 Previously in our laboratory we established a robust OC43 infection model in human embryonic kidney  
158 (HEK) 293A cells (44). This cell line, historically used for isolation and titration of adenoviruses (45–47),  
159 is also readily infected with many RNA viruses, including OC43, which rapidly replicates in 293A cells  
160 to high titers. To examine SG dynamics over the course of infection, we infected 293A cells with OC43 at  
161 multiplicity of infection (MOI) of 1.0 and analysed infected cells for the presence of SGs at various times  
162 post-infection using immunofluorescence staining for TIAR protein (Fig. 1A). We observed little to no  
163 SG formation until 48 h post infection (hpi), by which time many cells started lifting off and dying from  
164 infection. On average, only 5% of infected cells formed SGs at 24 hpi (Fig. 1A,D). Because there was  
165 little SG formation in OC43-infected cells, we analysed if OC43 actively inhibited SG formation. We  
166 treated mock and virus-infected cells with sodium arsenite (As) at 24 hpi. Arsenite is a potent SG-  
167 inducing agent which is commonly used to induce high levels of eIF2 $\alpha$  phosphorylation and SG  
168 formation. It causes oxidative stress and activates eIF2 $\alpha$  kinase heme-regulated inhibitor (HRI) (22,25).  
169 As expected, in mock-infected cells, SGs were induced in nearly 100% of cells. By contrast, less than half  
170 of the OC43-infected cells formed SGs following As treatment (Fig. 1B,D). Next, we tested levels of  
171 eIF2 $\alpha$  phosphorylation in infected cells and discovered that OC43 infection inhibited As-induced eIF2 $\alpha$   
172 phosphorylation, with increasing efficiency from 12 to 48 hpi (Fig. 1C). Thus, the inhibition of SG  
173 formation in OC43 infected cells could be, at least in part, due to viral inhibition of eIF2 $\alpha$   
174 phosphorylation-induced translation arrest upstream of SG nucleation.

175 To verify that our observations are not specific for 293A cells, we repeated analyses of OC43 effects on  
176 As-induced eIF2 $\alpha$  phosphorylation and SG formation in human colon (HCT-8) cells, which are often used  
177 to grow this virus, and the immortalized primary human upper airway epithelial BEAS-2B cells that more  
178 closely represent a cell type infected by coronaviruses *in vivo*. Arsenite-induced eIF2 $\alpha$  phosphorylation

179 and SG formation were inhibited in HCT-8 cells, however at the later time point, 48 hpi (Fig. 1E-H),  
180 possibly reflecting slower virus replication kinetics in this cell type compared to 293A. Indeed, at 24 hpi,  
181 much lower levels of OC43 N protein were detected in HCT-8 cells (compare lanes 3 and 4 to 7 and 8 in  
182 Fig. 1E). Similar to 293A, in infected BEAS-2B cells, eIF2 $\alpha$  phosphorylation and SG formation were  
183 inhibited at 24 hpi (Fig. 1I-K), indicating that these phenotypes are not limited to fully transformed cell  
184 types and that our 293A infection model is appropriate for analysis of SG responses to infection.

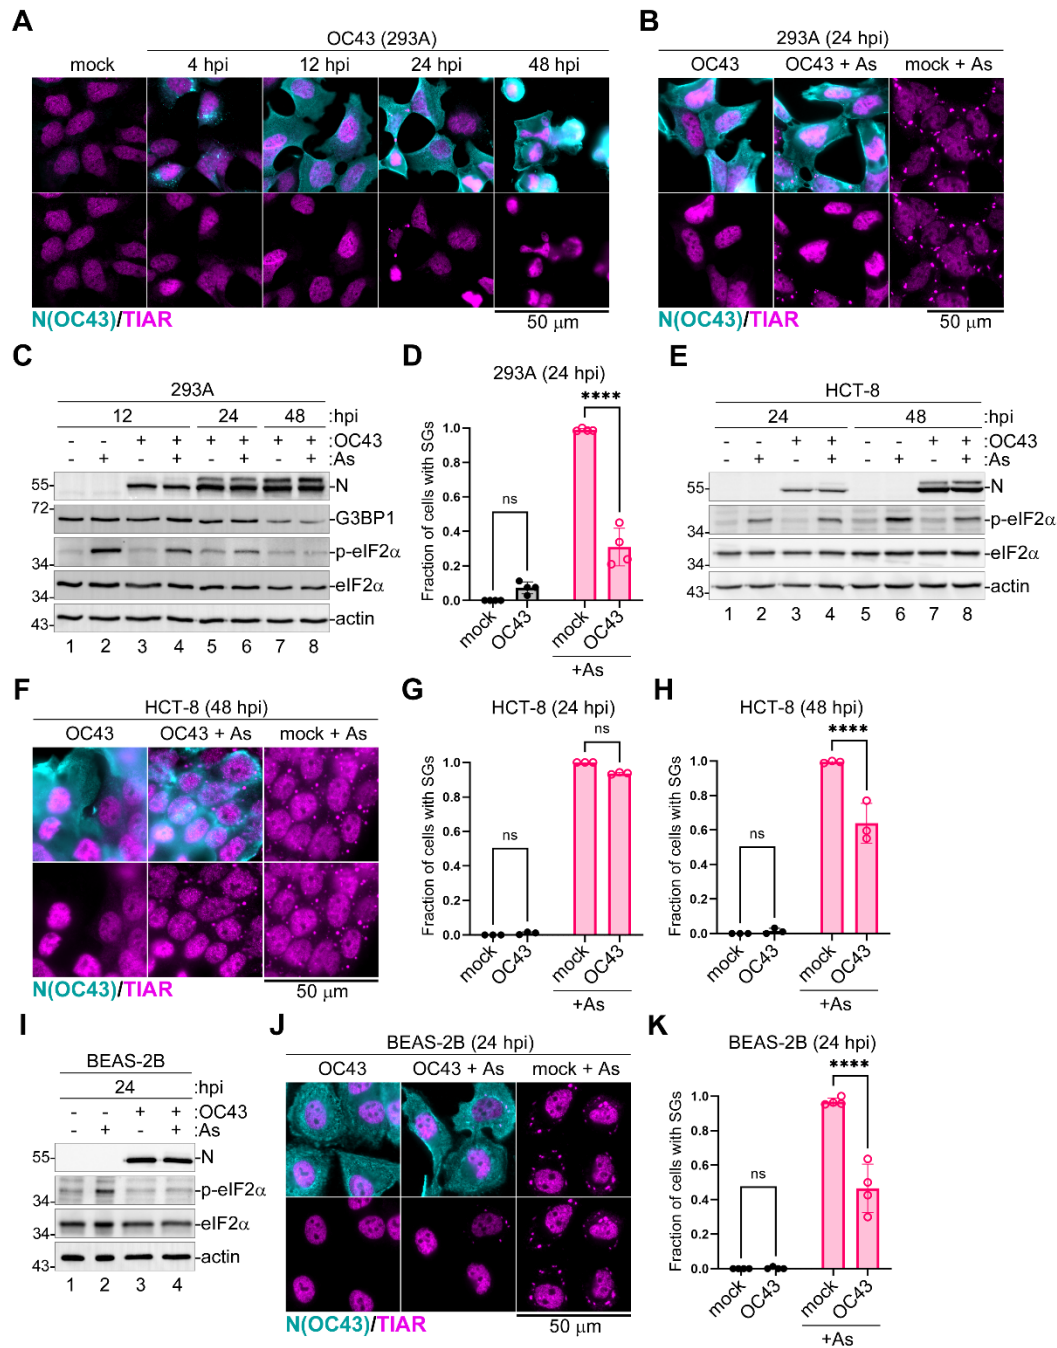

185

186 **Figure 1. Coronavirus OC43 inhibits SG formation and eIF2α phosphorylation.** Cells were infected  
 187 with OC43 and SG formation in infected cells was analyzed at the indicated times post-infection using  
 188 immunofluorescence staining for nucleoprotein (N(OC43), teal) and SG marker TIAR (magenta). Levels  
 189 of N protein accumulation and phosphorylation of eIF2α were analysed by western blot. hpi = hours post-  
 190 infection. Scale bars = 50 μm. (A) Immunofluorescence analysis of infected 293A cells at different

191 post-infection. (B,F,J) Immunofluorescence analysis of SG formation in mock infected and OC43-  
192 infected 293A (B), HCT-8 (F), and BEAS-2B (J) cells treated with sodium arsenite (+ As) or untreated  
193 infected cells at indicated times post-infection. (C,E,I) Western blot analysis of As-induced eIF2 $\alpha$   
194 phosphorylation and accumulation of N protein in 293A (C), HCT-8 (E), and BEAS-2B (I) cells at the  
195 indicated times post-infection. Levels of SG nucleating protein G3BP1 were also analyzed in (C). Actin  
196 was used as loading control. (D,G,H,K) Fraction of cells with SGs was quantified in mock and OC43-  
197 infected 293A cells at the indicated times post-infection. Two-way ANOVA and Tukey multiple  
198 comparisons tests were done to determine statistical significance (\*\*\*\*, p -value < 0.0001, ns = non-  
199 significant). On all plots each data point represents independent biological replicate (N  $\geq$  3). Error bars =  
200 standard deviation.

201 **Inhibition of SG formation in OC43-infected cells does not depend on blocking eIF2 $\alpha$**   
202 **phosphorylation.**

203 Given that OC43 infection simultaneously decreased arsenite-induced SG formation and eIF2 $\alpha$   
204 phosphorylation, we decided to test if this virus could block SGs formation induced by an eIF2 $\alpha$   
205 phosphorylation-independent pathway. To induce SGs in these experiments, we used Silvestrol, which  
206 inhibits the helicase eIF4A, an important translation initiation factor, and triggers SG formation without  
207 inducing phosphorylation of eIF2 $\alpha$  (48,49). 293A cells were infected with OC43 and treated with  
208 Silvestrol for 1 hour prior to analysis at 24 h post-infection. Similar to arsenite, Silvestrol treatment  
209 triggered SG formation in nearly 100% of mock-infected cells, while only half of OC43-infected cells had  
210 SGs (Fig. 2A,C). As expected, Silvestrol treatment did not induce eIF2 $\alpha$  phosphorylation (Fig.2B).  
211 Interestingly, in many infected cells we noticed brighter nuclear TIAR staining compared to uninfected  
212 cells, possibly indicating disruption of normal nucleocytoplasmic shuttling of TIAR (Fig. 1A,B, Fig. 2A).  
213 To confirm that OC43 effects were not limited to TIAR-containing SGs, we completed a series of  
214 experiments using multiple SG marker proteins to analyze SG formation in infected cells treated with  
215 either As or Silvestrol. These analyses confirmed that regardless of the markers used, including SG-

216 nucleating proteins G3BP1, G3BP2, and TIA-1, as well as translation initiation factors eIF4G and eIF3B,  
 217 formation of SG foci was inhibited by OC43 (Fig.2D). In addition, these analyses revealed that in a  
 218 fraction of infected cells that did form SGs, OC43 N protein was not accumulating in these foci (Fig. 2D).

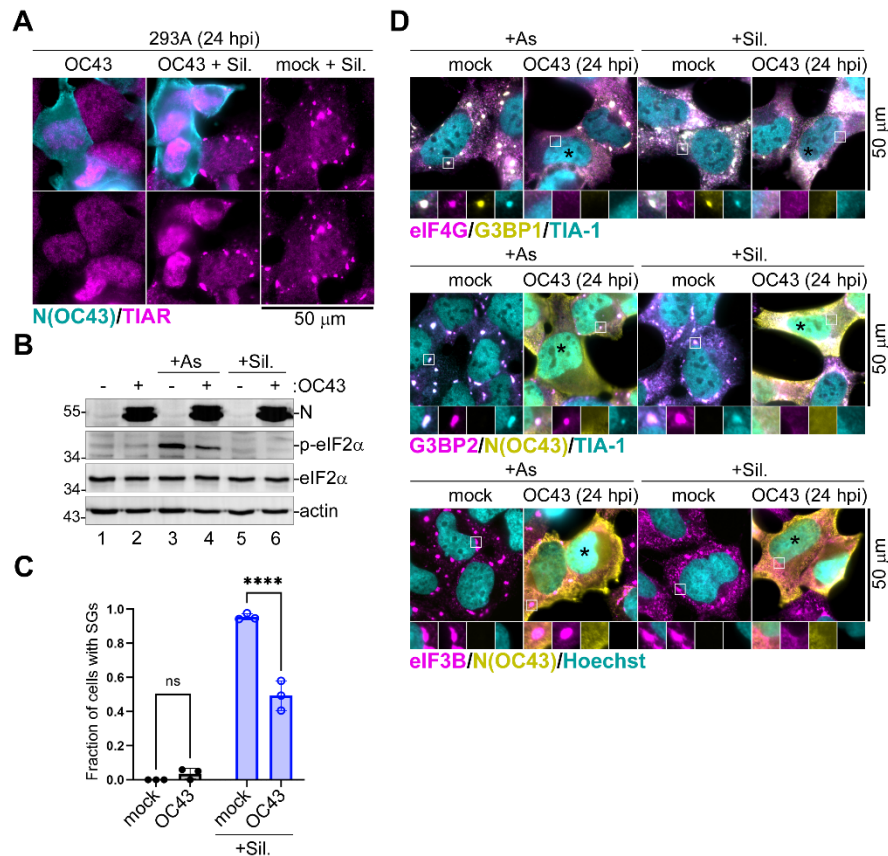

219  
 220 **Figure 2. OC43 inhibits SGs independently of eIF2α phosphorylation.** 293A cells were infected with  
 221 OC43 at MOI = 1.0 and SG formation in arsenite (+ As), Silvestrol (+ Sil.), and untreated mock and  
 222 OC43 infected cells was analyzed at 24 hours post-infection (hpi) using immunofluorescence staining for  
 223 nucleoprotein and the indicated SG markers. (A) Immunofluorescence analysis of SG formation in mock  
 224 infected and OC43-infected cells treated with Silvestrol (+ Sil.) or untreated infected cells. (B)  
 225 Phosphorylation of eIF2α was analysed by western blot. (C) Fraction of cells with SGs was quantified in  
 226 mock and OC43-infected 293A cells treated and stained as in panel (A). Each data point represents  
 227 independent biological replicate (N=3). Error bars = standard deviation. Two-way ANOVA and Tukey  
 228 multiple comparisons tests were done to determine statistical significance (\*\*\*\*, p -value < 0.0001, ns =



229 non-significant). (D) Representative images of mock infected and OC43 infected cells immunostained for  
230 SG markers eIF4G (magenta), G3BP1 (yellow), TIA-1 (teal), G3BP2 (magenta), and eIF3B (magenta) as  
231 indicated. Subcellular distribution of nucleoprotein (N(OC43), yellow) was visualised by immunostaining  
232 and nuclear DNA was visualised with Hoechst dye (teal) where indicated. Black asterisks indicate  
233 infected cells that did not form SGs. Insets show enlarged areas of cytoplasm with separation of  
234 channels to better visualize co-localization of SGs markers. Scale bars = 50  $\mu$ m.

235

### 236 **SARS-CoV2 blocks SG formation in infected cells and depletes SG nucleating protein G3BP1.**

237 Ectopic overexpression studies suggest that several gene products of pandemic CoV-2 virus can  
238 suppresses SG formation (17,35,50,51). To test if CoV2 can effectively block SG formation in our cell  
239 culture system, we infected 293A cells stably expressing ACE2 (293A-ACE2) with this virus and  
240 analysed SG formation. In our *in vitro* infection model, no SG formation was observed in CoV2-infected  
241 cells at either 12 hpi or 24 hpi (Fig.3A). In addition, CoV2 was able to effectively suppress SG formation  
242 induced by As (Fig. 3B,C). Compared to OC43, CoV2 infection resulted in much greater SG inhibition,  
243 with only about 8% of infected cells forming SGs following As treatment (Fig. 3C). Similar to OC43,  
244 CoV2 inhibited As-induced eIF2 $\alpha$  phosphorylation (Fig. 3D). Interestingly, we also observed an increase  
245 in nuclear TIAR signal in CoV2 infected cells, which was even more prominent than that was observed in  
246 OC43 infected cells (Fig.3A,B). When we compared total levels of TIAR in mock and CoV2 infected  
247 cells using western blot, we observed similar levels, indicating that the virus causes changes in subcellular  
248 distribution of TIAR without drastically affecting its expression (Fig. 3D,E). By contrast, we consistently  
249 observed substantial reduction in the levels of G3BP1 protein in CoV2 infected cells compared to mock  
250 (Fig. 3D,E). Unlike OC43 infection, which resulted in detectable decrease in G3BP1 levels only at 48 hpi  
251 (Fig. 1C), in CoV2 infected cells G3BP1 decrease was observed much earlier (Fig. 3D,E). To examine if  
252 these changes in G3BP1 expression were due to a decrease in its transcript levels, we isolated total RNA  
253 from mock and CoV2-infected cells at 24 hpi and analysed G3BP1 and TIAR mRNA levels using RT-



254 QPCR. Consistent with a known feature of CoV2 host shutoff causing cytoplasmic mRNA degradation,  
255 we detected dramatic depletion of both G3BP1 and TIAR transcripts in infected cells (Fig. 3F). The  
256 magnitude of mRNA depletion was slightly higher for G3BP1 (on average 80% depleted for G3BP1 vs.  
257 60% for TIAR), but alone it would not account for the observed differences in protein levels in infected  
258 cells. To examine relative stability of G3BP1 and TIAR proteins in 293A cells, we treated uninfected  
259 cells with two translation inhibitors, cycloheximide (CHX) and Silvestrol (Sil.), as well as the  
260 transcription inhibitor Actinomycin D (ActD) for 12 hours and measured protein levels using western  
261 blot. As expected, within 1 hour of treatment, CHX and Sil. potently blocked protein synthesis in 293A  
262 cells, while ActD had no effect (Fig. 3G). However, after 12 h only ActD treatment resulted in a small  
263 (~25%) but statistically significant decrease in G3BP1 and, to a lesser extent, TIAR protein levels, while  
264 translation inhibitors did not decrease either of these proteins (Fig. 3H-J). This suggests that neither  
265 G3BP1 nor TIAR are intrinsically unstable and rapidly degraded proteins. Instead, it points to a distinct  
266 turnover mechanism for these RNA-binding proteins that is activated in response to either decrease in  
267 transcription or total mRNA levels. As a control, we examined total levels of the translation initiation  
268 factor eIF4G and detected no changes in its expression after ActD treatment (Fig. 3K). These results  
269 suggest that the dramatic decrease in G3BP1 levels in CoV2 infected cells is primarily due to mRNA  
270 depletion rather than translation arrest, which are both features of CoV2 host shutoff. However, a direct  
271 targeting of G3BP1 for degradation by a viral protein cannot be ruled out. In either case, given the central  
272 role of G3BP1 in nucleating SGs, its depletion undoubtedly contributes to potent SG suppression by  
273 CoV2.

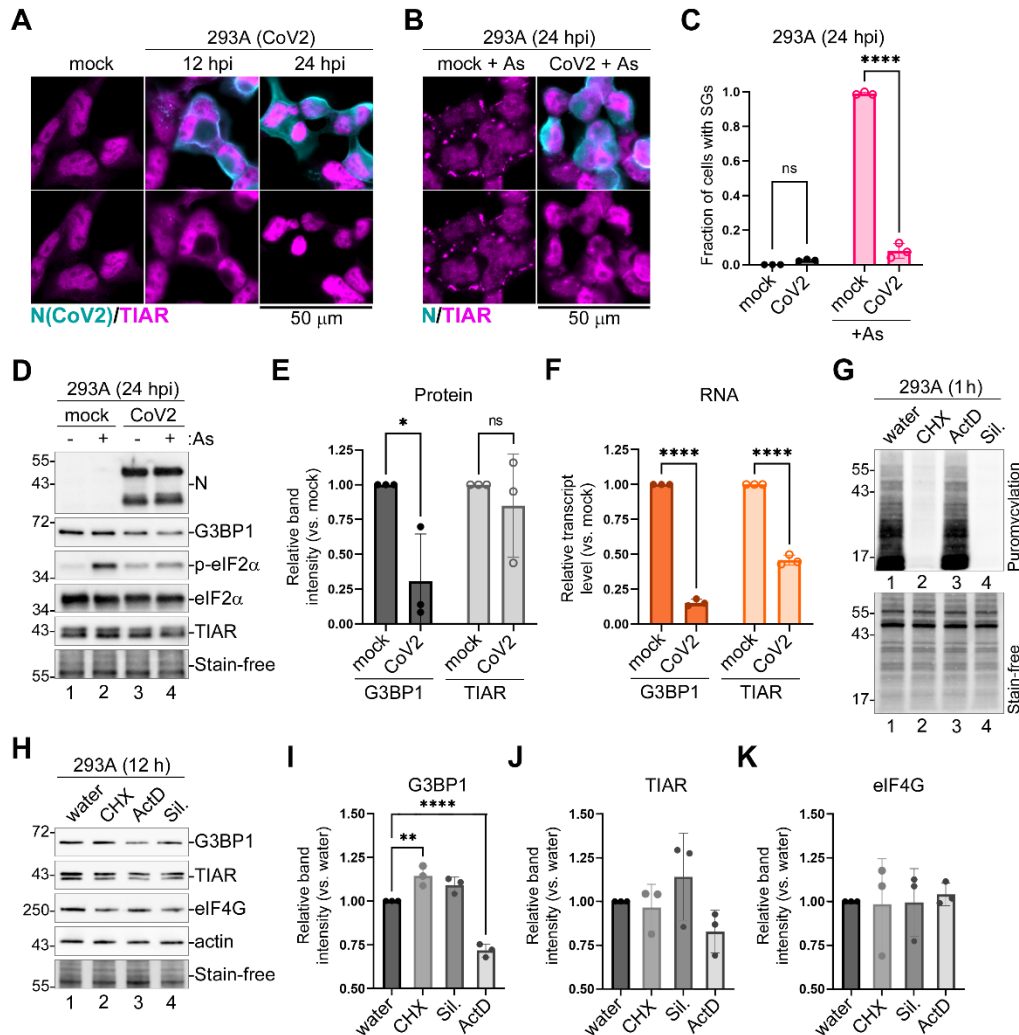

274

275 **Figure 3. SARS-CoV-2 inhibits SG formation and decreases expression of G3BP1.** (A) 293A-ACE2  
276 cells were infected with CoV2 at MOI = 1.0 and mock and CoV2 infected cells were analysed by  
277 immunofluorescence microscopy using immunostaining for viral nucleoprotein (N, teal) and SG marker  
278 TIAR (magenta) at the indicated times post-infection. (B) Immunofluorescence microscopy of mock and  
279 CoV2 infected 293A-ACE2 cells treated with As at 24 hpi. Staining was performed as in (A). In (A) and  
280 (B) scale bars = 50  $\mu$ m. (C) Fraction of cells with SGs was quantified in mock and CoV2 infected cells  
281 treated and stained as in panel (B). Error bars = standard deviation. Two-way ANOVA and Tukey  
282 multiple comparisons tests were done to determine statistical significance (\*\*\*\*,  $p$ -value < 0.0001, ns =  
283 non-significant). (D) Western blot analysis of As-induced eIF2 $\alpha$  phosphorylation and accumulation of N  
284 protein in 293A-ACE2 cells at 24 hpi. Levels of SG nucleating proteins G3BP1 and TIAR were also

285 analyzed, fluorescent total protein stain (Stain-free) was used as loading control. (E) Band intensity of  
286 G3BP1 and TIAR normalized to total protein (Stain-free) quantified from 3 independent experiments  
287 represented in D (lanes 1 and 3), (\*, p -value < 0.05, ns, non-significant, as determined by unpaired  
288 Students t-Test). (F) Relative transcript levels of G3BP1 and TIAR determined by RT-QPCR (\*\*\*\*, p -  
289 value < 0.0001, ns, non-significant, as determined by unpaired Students t-Test). (G) Ribopuromylation  
290 assay in 293A cells treated with cycloheximide (CHX), Actinomycin D (ActD), Silvestrol (Sil.) or water  
291 control. Top - puromycin incorporation detected by western blot. Bottom – total protein visualized by  
292 Stain-free dye. (H) Western blot of 293A cells treated as in G for 12h. (I-K) Relative band intensity of  
293 G3BP1 (I), TIAR (J), and eIF4G (K) normalized to total protein (Stain-free), quantified from 3  
294 independent experiments represented in H. Two-way ANOVA and Tukey multiple comparisons tests  
295 were done to determine statistical significance (\*\*, p -value < 0.01; \*\*\*\*, p -value < 0.0001). On all plots  
296 each data point represents independent biological replicate (N=3). Error bars = standard deviation.

#### 297 **N proteins of OC43 and CoV2 inhibit SG formation.**

298 Previous studies demonstrated that CoV2 N and Nsp15 proteins inhibit SG formation upon ectopic  
299 overexpression (17,33,51–53). To test if OC43 N and Nsp15 proteins contribute to SG inhibition by this  
300 virus, we overexpressed EGFP-tagged OC43 N and Nsp15 proteins, the EGFP-tagged CoV2 N protein, or  
301 EGFP control in 293A cells and assessed their effect on SG formation. First, we analyzed SG formation  
302 in cells transiently transfected with CoV2 and OC43 N expression constructs or EGFP control and treated  
303 with As at 24 h post-transfection. Western blot analysis revealed that the OC43 and CoV2 EGFP-N fusion  
304 proteins were expressed at similar levels, and that neither of the N constructs affected G3BP1 expression  
305 levels or As-induced eIF2 $\alpha$  phosphorylation (Fig. 4A). As expected, immunofluorescence microscopy  
306 analyses showed that nearly 100% of the EGFP expressing cells formed SGs upon As treatment, while  
307 CoV2 N expression efficiently inhibited SG formation (Fig. 4B,C). In OC43 N expressing cells, SG  
308 formation was also inhibited, but to a lesser extent (Fig. 4C). Given that N proteins did not affect eIF2 $\alpha$   
309 phosphorylation, we next tested if OC43 and/or CoV2 EGFP-N constructs could inhibit Silvestrol-

310 induced SG formation. Indeed, both N constructs were able to inhibit Silvestrol-induced SG formation  
311 (Fig 4D,E), and the OC43 N protein was even better at inhibiting Silvestrol-induced SGs than the As-  
312 induced SGs (Fig. 4C,E). This indicates that N proteins of these coronaviruses directly affect SG  
313 formation downstream of translation arrest, consistent with direct interaction with SG nucleating protein  
314 G3BP1 by CoV2 N reported by previous studies (33,51).

315 Next, we focused on Nsp15 of OC43 to determine if it can interfere with SG formation. We transfected  
316 293A cells with EGFP-tagged OC43 Nsp15 or EGFP control and treated cells with As at 24 h post-  
317 transfection to induce SGs. Similar to N constructs, EGFP-Nsp15 did not affect As-induced eIF2 $\alpha$   
318 phosphorylation (Fig. 4F). Furthermore, OC43 Nsp15 did not significantly affect As-induced SG  
319 formation (Fig. 4G,H). Thus, we conclude that Nsp15 is not contributing to inhibition of As-induced SGs  
320 by OC43 in our experimental system.

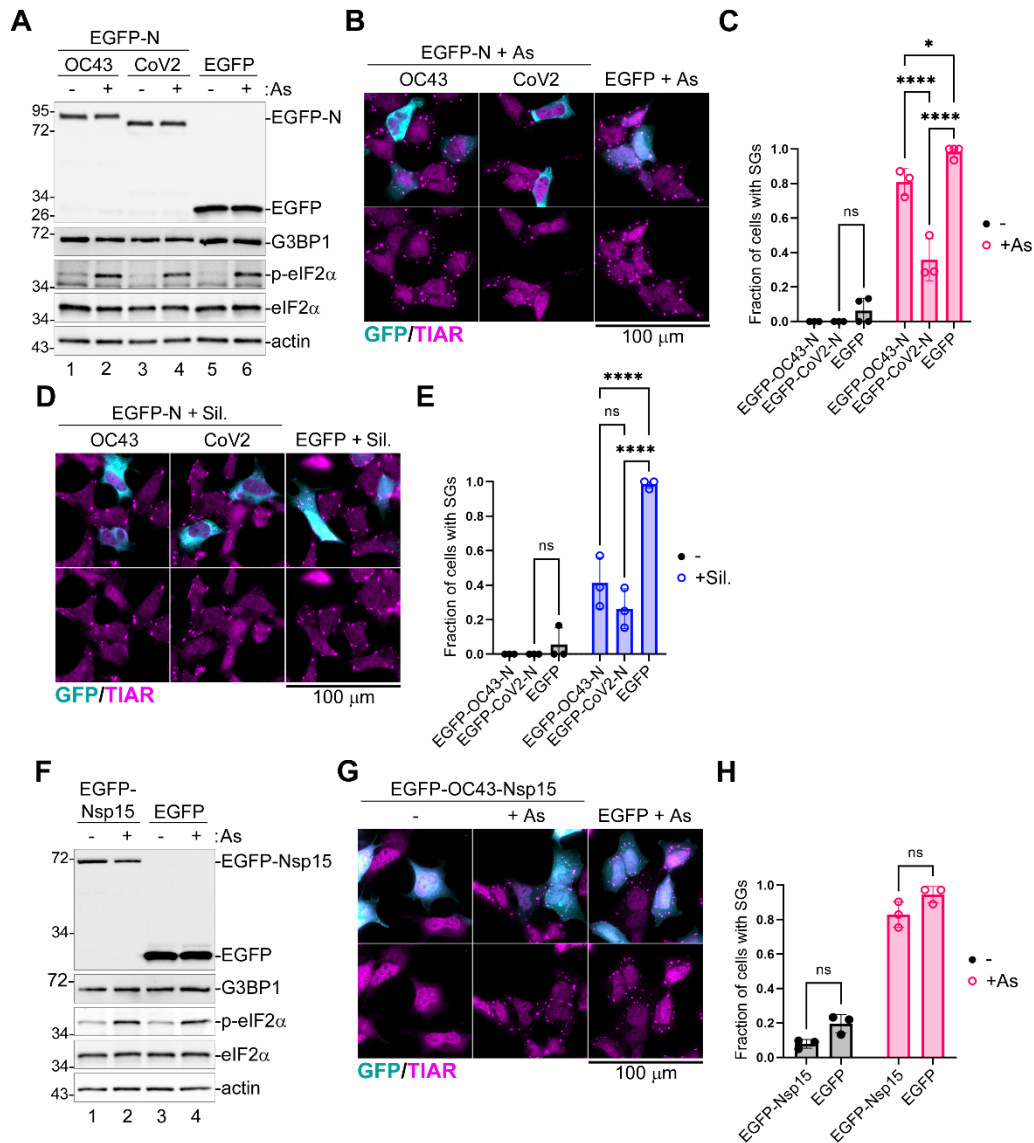

321

322 **Figure 4. Coronavirus N proteins inhibit SG formation downstream of eIF2 $\alpha$  phosphorylation.**

323 293A cells were transiently transfected with the indicated EGFP-tagged viral protein expression  
 324 constructs or EGFP control. At 24 h post-transfection cells were treated with sodium arsenite (+ As) or  
 325 Silvestrol (+ Sil.), as indicated, or left untreated. SG formation was analyzed by immunofluorescence  
 326 microscopy with staining for SG marker TIAR (magenta). EGFP expression is shown in teal. Scale bars =  
 327 100  $\mu$ m. Levels of EGFP-tagged proteins and the As-induced phosphorylation of eIF2 $\alpha$  were analyzed by  
 328 western blot. (A) Western blot analysis of cells transfected with EGFP-tagged OC43 or CoV2  
 329 nucleoprotein (EGFP-N) expression vectors or control EGFP-transfected cells. (B) Immunofluorescence

330 microscopy of EGFP-N transfected, or control EGFP-transfected cells treated with arsenite. C) Fraction  
331 of transfected cells with As-induced SGs quantified from B. (D) Immunofluorescence microscopy of  
332 EGFP-N transfected or control EGFP-transfected cells treated with Silvestrol. (E) Fraction of transfected  
333 cells with Silvestrol-induced SGs quantified from D. (F) Western blot of OC43 EGFP-Nsp15 transfected  
334 or control EGFP transfected cells treated with arsenite. (G) Immunofluorescence microscopy of OC43  
335 EGFP-Nsp15 transfected, or control EGFP-transfected cells treated with arsenite. (H) Fraction of  
336 transfected cells with As-induced SGs quantified from G. On all plots each data point represents  
337 independent biological replicate (N=3). Error bars = standard deviation. Two-way ANOVA and Tukey  
338 multiple comparisons tests were done to determine statistical significance (\*\*\*\*, p -value < 0.0001, \*, p-  
339 value < 0.05, ns, non-significant).

#### 340 **Nsp1-mediated host shutoff contributes to SG inhibition by coronaviruses.**

341 N proteins of both OC43 and CoV2 coronaviruses are responsible, at least in part, for inhibition of SG  
342 condensation downstream of translation arrest, without affecting levels of eIF2 $\alpha$  phosphorylation or  
343 expression of G3BP1. However, the magnitude of SG inhibition observed in EGFP-N expressing cells  
344 was much lower than in virus-infected cells. Therefore, it is likely that additional mechanisms of SG  
345 suppression may be used by these coronaviruses. Because of the link between host mRNA degradation  
346 mediated by CoV2 host shutoff and the depletion of G3BP1, we tested if Nsp1 proteins, major host  
347 shutoff factors of OC43 and CoV2, could inhibit SG formation. Importantly, only CoV2 Nsp1 was  
348 previously shown to induce degradation of cellular mRNAs (39,42,54), while both OC43 and CoV2 Nsp1  
349 proteins block translation initiation. When we transfected 293A cells with N-terminally HA-tagged Nsp1  
350 constructs or EGFP control and induced SG formation with As 24 h post-transfection, we saw that both  
351 OC43 and CoV2 Nsp1 were inhibiting SG formation as determined by TIAR staining (Fig. 5A). We also  
352 observed that CoV2 Nsp1 was causing depletion of cytoplasmic and increase in nuclear TIAR signal. This  
353 suggests that Nsp1 is responsible for disruption of nucleocytoplasmic shuttling of TIAR we saw  
354 previously in CoV2 infected cells. Western blotting analysis demonstrated that our Nsp1 constructs were

355 inhibiting production of co-transfected EGFP reporter, as expected, confirming their activity in blocking  
356 host gene expression. Notably, CoV2 Nsp1 had stronger effect on EGFP expression, likely because of  
357 additional activity of stimulating mRNA degradation (Fig. 5B). In addition, western blot analysis revealed  
358 that both OC43 and CoV2 Nsp1 significantly attenuated As-induced eIF2 $\alpha$  phosphorylation (Fig. 5B,C).  
359 OC43 Nsp1 inhibited eIF2 $\alpha$  phosphorylation by 30% on average, and CoV2 Nsp1 by 40%. Since we  
360 consistently observed transfection efficiencies of 40-60% in these experiments, inhibition of p-eIF2 $\alpha$  in  
361 transfected cells may be even stronger. Next, we tested if Nsp1 proteins affected G3BP1 protein  
362 expression. Because our HA and G3BP1 antibodies suitable for immunofluorescence staining are both  
363 mouse, we constructed N-terminally EGFP-tagged Nsp1 constructs and analysed levels and subcellular  
364 localization of G3BP1 in transfected cells treated with As. In OC43 EGFP-Nsp1 expressing cells, SG  
365 formation was inhibited and G3BP1 was diffusely distributed in the cytoplasm even upon treatment with  
366 As. In contrast, in CoV2 EGFP-Nsp1 expressing cells, G3BP1 signal was much lower than in bystander  
367 untransfected cells, EGFP expressing control cells, or OC43 EGFP-Nsp1 cells (Fig. 5D). Both TIAR and  
368 G3BP1 are important SG nucleating proteins, therefore the CoV2 Nsp1 mediated redistribution of TIAR  
369 into the nucleus and depletion of G3BP1 levels could potentially disrupt cytoplasmic SG condensation.  
370 Alternatively, using TIAR or G3BP1 as SG markers in these cells could compromise visualization of SGs  
371 that may lack these proteins. To distinguish between these possibilities, we stained for G3BP2, another  
372 well established SG marker. Unlike with G3BP1 staining, we did not see significant decrease in G3BP2  
373 signal in either OC43 or CoV2 Nsp1 expressing cells, instead we observed that some CoV2 Nsp1  
374 expressing cells were forming small G3BP2-positive SGs upon As treatment (Fig. 5E). We analysed the  
375 number and size of As-induced G3BP2-positive SGs that form in CoV2 Nsp1 expressing cells and  
376 compared them to SGs formed in control EGFP expressing cells. This analysis revealed that SGs that do  
377 form in many CoV2 Nsp1-expressing cells are significantly smaller than SGs that form in control cells,  
378 while their average number remains the same (Fig. 5F).



379 We observed depletion of G3BP1 protein and mRNA in CoV2 infected cells. Next, we tested if G3BP1  
380 depletion by CoV2 Nsp1 but not by OC43 Nsp1 is linked to mRNA degradation induced by the former.  
381 We generated two CoV2 Nsp1 amino acid substitution mutants that are defective for mRNA degradation  
382 function but are still able to inhibit host protein synthesis: R99A N-terminal domain mutant (99A) and  
383 R124A,K125A linker region double mutant (125A) (42). We transiently transfected 293A cells with the  
384 OC43 Nsp1, the wild type CoV2 Nsp1, with mutant CoV2 Nsp1 constructs, or with EGFP control and  
385 induced SG formation in these cells 24 h post-transfection using As treatment. Immunofluorescence  
386 microscopy analysis revealed that all Nsp1 constructs were able to inhibit As-induced SG formation to  
387 various degrees (Fig.5G). However, only the wild type CoV2 Nsp1 caused a dramatic increase in nuclear  
388 TIAR signal, while OC43 Nsp1, CoV2 99A, and 125A mutants did not affect subcellular TIAR  
389 distribution compared to EGFP control (Fig. 5G). Western blot analysis of whole cell lysates revealed that  
390 none of the Nsp1 constructs altered total TIAR protein levels, indicating that like CoV2 infection, the  
391 wild type CoV2 Nsp1 expression alters nucleocytoplasmic shuttling of TIAR without affecting its  
392 expression (Fig. 5H). In addition, only the wild type CoV2 Nsp1 overexpression caused depletion of  
393 G3BP1 protein (Fig. 5H, lane 3). This alteration in G3BP1 levels was not observed in OC43 Nsp1-  
394 expressing cells or cells expressing CoV2 Nsp1 mutants defective in stimulating mRNA degradation (Fig.  
395 5H, lanes 2,4,5). These results strongly link CoV2 Nsp1-mediated host mRNA degradation to both the  
396 nuclear accumulation of TIAR and the depletion of G3BP1 protein. Indeed, when we analyzed host  
397 transcript levels in cells transfected with Nsp1 constructs by RT-QPCR, we confirmed that only the wild  
398 type CoV2 Nsp1 caused decrease in G3BP1, G3BP2, and  $\beta$ -actin (ACTB) mRNAs (Fig. 5J). This  
399 indicated that unlike CoV2 Nsp1, the OC43 Nsp1 does not cause mRNA degradation, and that the amino  
400 acid substitution mutants we generated behave as expected. Interestingly, none of the Nsp1 constructs  
401 decreased TIAR transcript levels, with the wild type CoV2 Nsp1 causing modest but statistically  
402 significant increase in TIAR mRNA compared to EGFP control (Fig. 5J).



403 To measure and compare SG inhibition by our panel of Nsp1 constructs, we quantified As-induced SG  
404 formation using different markers. We saw that when SGs were stained using TIAR as a marker, like in  
405 Fig. 5A and 5G, the wild type CoV2 Nsp1 appeared significantly better at preventing SG formation  
406 compared to 99A or 125A mutants that did not cause nuclear accumulation of TIAR (Fig. 5I). By  
407 contrast, when we quantified G3BP2-positive SGs, wild type and mutant Nsp1 constructs inhibited SG  
408 formation to the same degree (Fig. 5F). While all Nsp1 constructs inhibited SG formation visualized  
409 using G3BP2 as a marker, more than 50% of cells still formed SGs. Therefore, it is apparent that in many  
410 wild type CoV2 Nsp1-expressing cells SGs still form, but they contain very little TIAR and G3BP1.

411 To examine if inhibition of eIF2 $\alpha$  phosphorylation is the main mechanism of SG suppression by OC43  
412 Nsp1, we treated OC43 Nsp1, CoV2 Nsp1, and EGFP expressing cells with Silvestrol. To visualize SGs  
413 we used G3BP2 and TIA-1 markers. Bright SG foci formed in the cytoplasm of EGFP-expressing and  
414 untransfected bystander cells, as well as in cells expressing OC43 Nsp1 (Fig. 5K). At the same time, most  
415 CoV2 Nsp1 expressing cells had either smaller dispersed SG foci or no discernable SGs (Fig. 5K). We  
416 quantified the fraction of cells with Silvestrol-induced SGs in all three conditions and demonstrated that  
417 only CoV2 Nsp1 decreased SG formation (Fig. 5L). This indicates that mRNA and G3BP1 depletion, as  
418 well as nuclear retention of TIAR by CoV2 Nsp1 contribute to impaired SG condensation independent of  
419 eIF2 $\alpha$  phosphorylation inhibition, with roughly 25% of transfected cells not forming SGs and the  
420 remaining cells forming smaller SGs. OC43 Nsp1, on the other hand, did not significantly inhibit SG  
421 formation when induced by a mechanism that is independent of eIF2 $\alpha$  phosphorylation. Taken together,  
422 our experiments show that both OC43 and CoV2 Nsp1 inhibit As-induced SG formation. They both act  
423 upstream by inhibiting eIF2 $\alpha$  phosphorylation, and in the case of CoV2 Nsp1, downstream by affecting  
424 SG nucleation and composition. The mRNA degradation stimulated by CoV2 Nsp1 that causes nuclear  
425 accumulation of TIAR and depletion of G3BP1 protein prevents efficient SG condensation, leading to  
426 formation of smaller granules lacking TIAR and G3BP1.

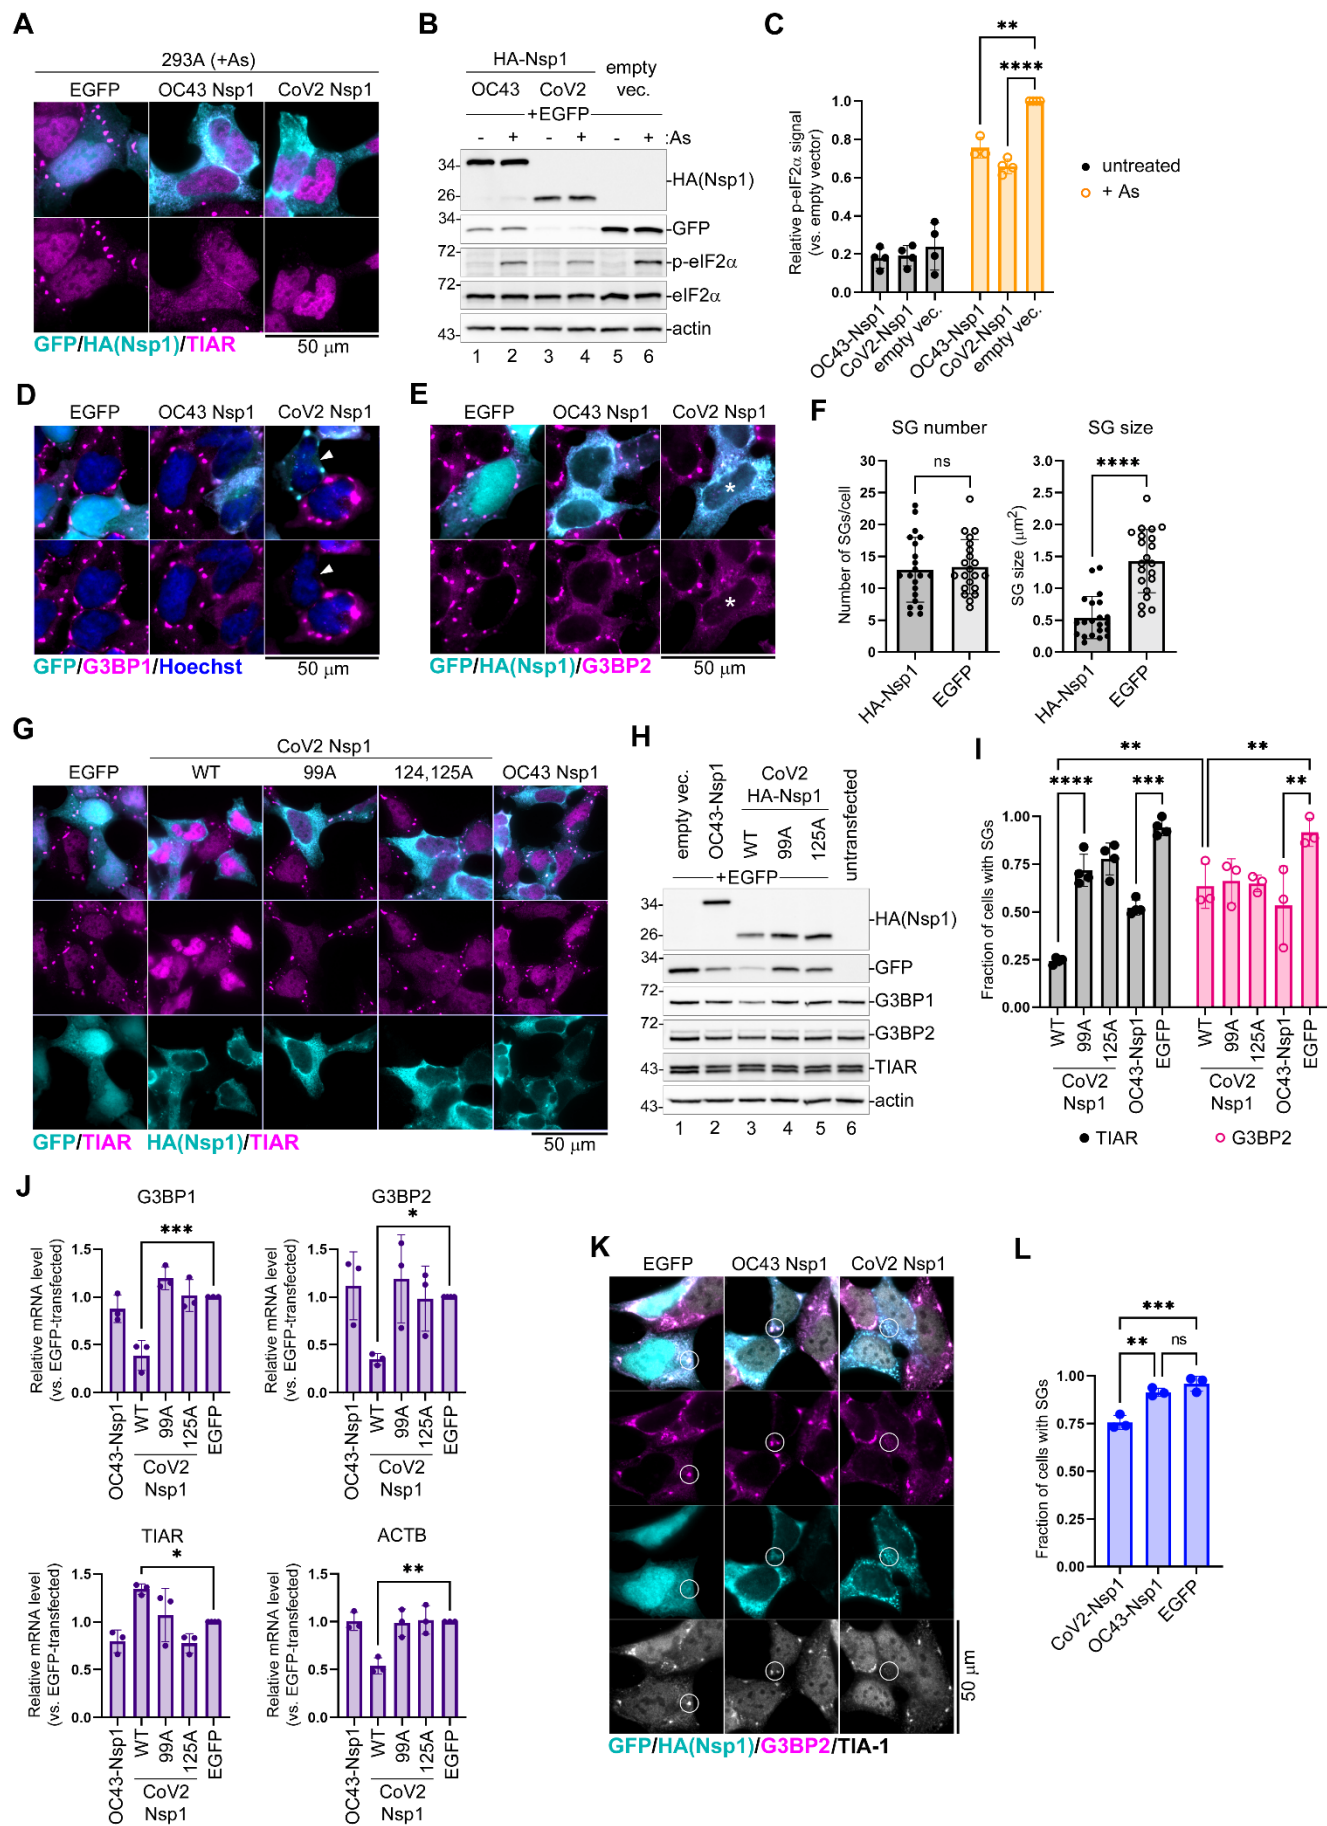

428 **Figure 5. Nsp1 inhibits eIF2 $\alpha$  phosphorylation and SG formation.** (A) 293A cells were transiently  
429 transfected with the indicated HA-tagged Nsp1 expression constructs or EGFP control. At 24 h post-  
430 transfection cells were treated with sodium arsenite (+ As) and SG formation analysed by  
431 immunofluorescence microscopy staining for TIAR (magenta). GFP signal in control cells and HA-  
432 tagged Nsp1 signal are shown in teal. Scale bar = 50  $\mu$ m. (B) Whole cell lysates from cells treated as in A  
433 with or without As were analysed by western blot. (C) Phospho-eIF2 $\alpha$  band intensity normalized to total  
434 eIF2 $\alpha$  was quantified from B and plotted relative to phospho-eIF2 $\alpha$  level in EGFP control cells treated  
435 with As. Each data point represents independent biological replicate (N $\geq$ 3). Error bars = standard  
436 deviation. Two-way ANOVA and Tukey multiple comparisons tests were done to determine statistical  
437 significance (\*\*\*\*, p -value < 0.0001; \*\*\*, p-value < 0.001; \*\*, p-value < 0.01). (D) Immunofluorescence  
438 microscopy analysis of cells expressing the indicated EGFP-tagged Nsp1 constructs or EGFP control. SG  
439 formation was visualized by staining for G3BP1 (magenta). GFP signal is shown in teal. Arrowhead  
440 indicates a representative cell with low G3BP1 signal. Scale bar = 50  $\mu$ m. (E) Immunofluorescence  
441 microscopy analysis of cells expressing the indicated HA-tagged Nsp1 constructs or EGFP control. SG  
442 formation was visualized by staining for G3BP2 (magenta). GFP signal in control cells and HA-tagged  
443 Nsp1 signal are shown in teal. Asterisks indicates a representative CoV2 Nsp1 expressing cell with small  
444 SGs. Scale bar = 50  $\mu$ m. (F) G3BP2-positive SG number per cell and average SG size per cell were  
445 quantified in CoV2 HA-Nsp1-transfected cells and control EGFP-transfected cells from E. Each data  
446 point represents individual cell analysed from 3 independent biological replicates (21 cells per condition).  
447 Error bars = standard deviation. Two-tailed Students t-Test was done to determine statistical significance.  
448 (\*\*\*\*, p -value < 0.0001, ns, non-significant). (G) Immunofluorescence microscopy analysis of cells  
449 expressing the indicated wild type and mutant Nsp1 constructs. SG formation was visualized by staining  
450 for TIAR (magenta). GFP signal in control cells and HA-tagged Nsp1 signal is shown in teal. WT = wild  
451 type; 99A = R99A mutant; 125A = R124A,K125A mutant. Scale bar = 50  $\mu$ m. (H) Western blot analysis  
452 of cells co-transfected with the indicated HA-tagged Nsp1 constructs and EGFP. (I) Fraction of  
453 transfected cells with As-induced SGs quantified from G (TIAR) and E (G3BP2). Each data point

454 represents independent biological replicate ( $N \geq 3$ ). Error bars = standard deviation. Two-way ANOVA  
455 and Tukey multiple comparisons tests were done to determine statistical significance (\*\*\*\*, p-value <  
456 0.0001; \*\*, p-value <0.01; \*, p-value < 0.05, ns, non-significant). (J) Relative G3BP1, G3BP2, TIAR, and  
457 ACTB mRNA levels were determined using RT-QPCR in cells transfected with the indicated expression  
458 constructs at 24 h post-transfections. Values were normalized to 18S. Each data point represents  
459 independent biological replicate ( $N=3$ ). Error bars = standard deviation. One-way ANOVA and Dunnett's  
460 multiple comparisons tests were done to determine statistical significance (\*\*\*, p-value < 0.001; \*\*, p-  
461 value <0.01; \*, p-value < 0.05). (K) Immunofluorescence microscopy analysis of cells expressing the  
462 indicated HA-tagged Nsp1 constructs or EGFP control and treated with Silvestrol. SG formation was  
463 visualized by staining for G3BP2 (magenta) and TIA-1 (greyscale). GFP signal in control cells and HA-  
464 tagged Nsp1 signal are shown in teal. Circles highlight areas of cytoplasm with and without bright SG  
465 foci. Scale bar = 50  $\mu$ m. (L) Fraction of transfected cells with silvestrol-induced SGs quantified from K  
466 (based on G3BP2 staining). Each data point represents independent biological replicate ( $N=3$ ). Error bars  
467 = standard deviation. One-way ANOVA and Tukey multiple comparisons tests were done to determine  
468 statistical significance (\*\*\*, p-value < 0.001; \*\*, p-value <0.01; ns, non-significant).

#### 469 **G3BP1 overexpression interferes with OC43 infection.**

470 G3BP1 is one of the most important SG nucleating proteins. Apart from its function in nucleating SG  
471 formation it is also involved in antiviral signaling. Since our work revealed that coronaviruses are  
472 efficient at blocking SG condensation and that CoV2 host shutoff causes G3BP1 depletion, we decided to  
473 test if G3BP1 overexpression would be detrimental to virus replication. We generated 293A cells stably  
474 transduced with lentivirus vectors encoding EGFP-tagged G3BP1 (293A[EGFP-G3BP1]) and control  
475 cells expressing EGFP (293A[EGFP]). To ensure similar levels of expression of these constructs, we  
476 sorted early passage cells to have both cell lines with similar GFP signal intensity. Although transient  
477 overexpression of G3BP1 may trigger SG formation in the absence of exogenous stress (55), we  
478 previously confirmed that this approach generated stable cell lines that did not form SGs spontaneously

479 (30,56). Initial testing of these cell lines revealed no major differences in cell morphology or SG  
480 formation following As treatment (Fig.6A). We infected 293A[EGFP], 293A[EGFP-G3BP1], and  
481 parental untransduced 293A cells with the same OC43 virus inoculum at the MOI = 1.0 and analyzed  
482 infection rates using immunofluorescence microscopy staining at 24 hpi. This analysis revealed that  
483 293A[EGFP-G3BP1] cells were significantly more resistant to virus infection than either parental or  
484 control 293A[EGFP] cells (Fig. 6B,C). Importantly, this was not due to lentiviral integration or non-  
485 specific effect of EGFP overexpression as infection rates were the same between 293A[EGFP] and  
486 parental untransduced cells (Fig. 6B,C). Western blot analysis confirmed that the EGFP-G3BP1 fusion  
487 protein was expressed at higher levels than the endogenous G3BP1 (Fig. 6D). The ectopic overexpression  
488 of EGFP-G3BP1 but not the EGFP control caused noticeable decrease in endogenous G3BP1 and G3BP2  
489 expression, but the total level of G3BP1 still remained much higher. Consistent with lower infection rates  
490 observed in 293A[EGFP-G3BP1] cells, the accumulation of viral N protein was decreased as well (Fig.  
491 6D). To examine whether the increased resistance of 293[EGFP-G3BP1] cells to coronavirus infection  
492 was due to increased SG formation, we analyzed infected cells at 24 hpi using immunofluorescence  
493 microscopy with staining for G3BP2 in addition to immunostaining for viral N protein. We did not  
494 observe increased SG formation in 293[EGFP-G3BP1] cells compared to either control, with most cells  
495 remaining SG-free (Fig. 6E). This result suggests that OC43 virus is effective at suppressing SG  
496 formation even when G3BP1 levels are elevated. This also indicates that the antiviral function of G3BP1  
497 is not limited to SG nucleation.



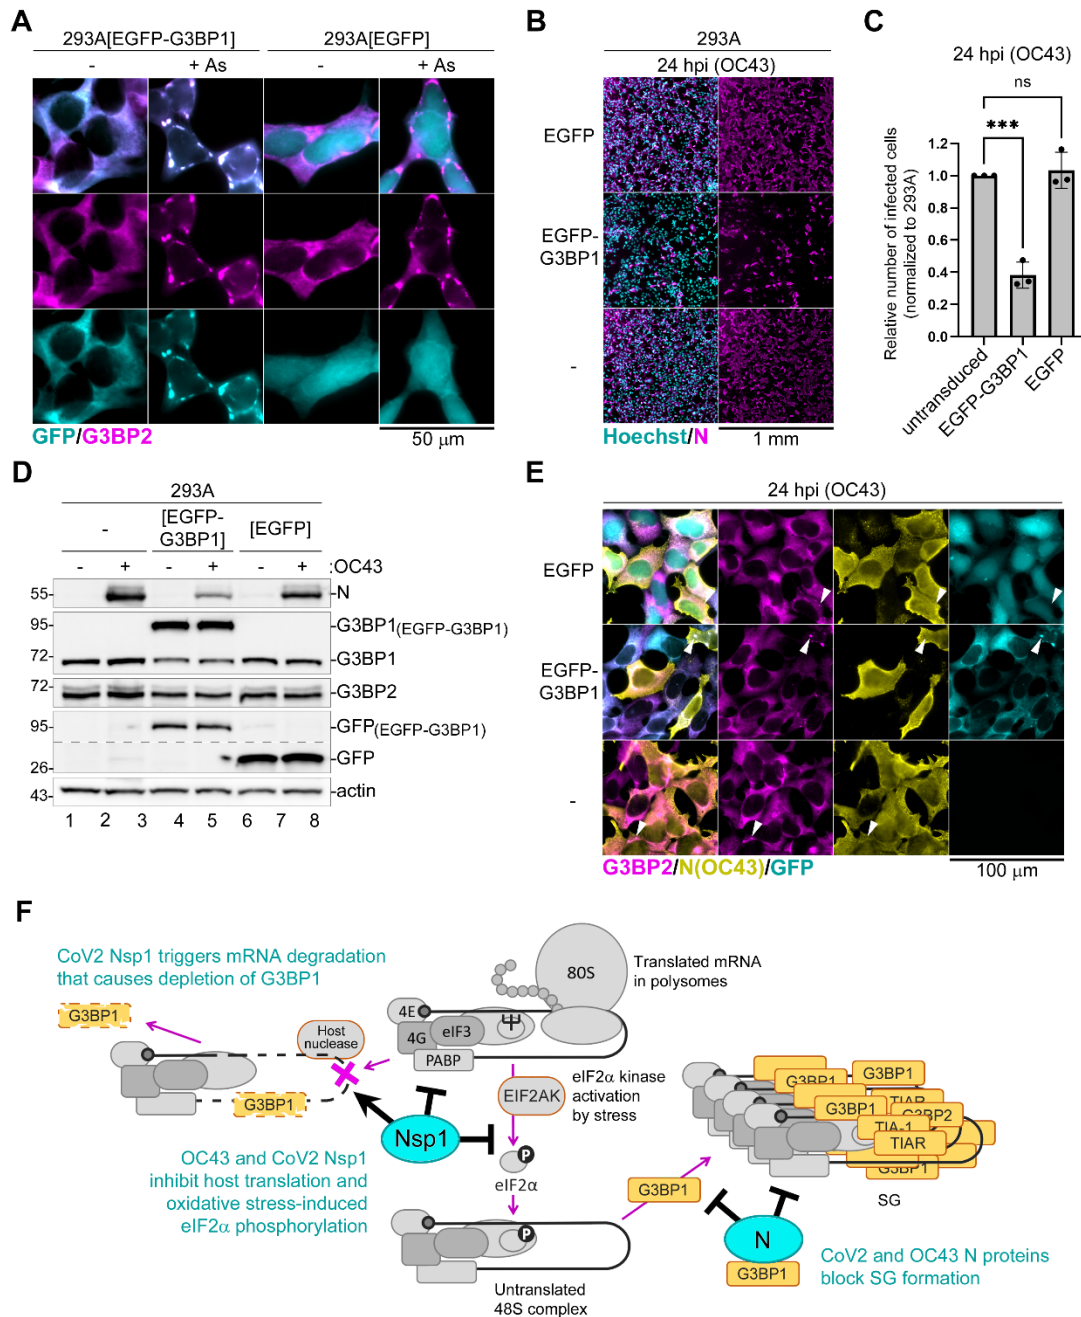

498

499 **Figure 6. G3BP1 overexpression inhibits OC43 infection independent from SG formation.** (A)

500 Immunofluorescence microscopy analysis of 293A[EGFP] and 293A[EGFP-G3BP1] cells untreated (-) or

501 treated with arsenite (+ As) and stained for G3BP2 (magenta). GFP signal is shown in teal. Scale bar = 50

502 μm. (B) Immunofluorescence microscopy analysis of parental 293A cells (-), 293A[EGFP], and

503 293A[EGFP-G3BP1] cells infected with OC43 at MOI = 1.0 and stained for OC43 N protein (magenta) at

504 24 hpi. Nuclei were stained with Hoechst dye (teal). Scale bar = 1 mm. (C) Relative number of infected  
505 cells (normalized to 293A) in 293A[EGFP] and 293A[EGFP-G3BP1] cells at 24 hpi, quantified from E.  
506 Each data point represents independent biological replicate (N=3). Error bars = standard deviation. One-  
507 way ANOVA and Dunnett's multiple comparisons tests were done to determine statistical significance  
508 (\*\*\*, p -value < 0.001, ns, non-significant). (D) Western blot analysis of 293A, 293A[EGFP], and  
509 293A[EGFP-G3BP1] cells infected with OC43 at 24 hpi. Anti-GFP blot was spliced along the dotted line  
510 to reduce vertical size. (E) Immunofluorescence microscopy of cells infected as in B and immunostained  
511 for G3BP2 (magenta) and OC43 N (yellow). GFP signal is shown in teal. Arrowheads indicate infected  
512 cells that formed SGs. Scale bar = 100  $\mu$ m. (F) Diagram illustrating concerted action of N and Nsp1  
513 proteins in disrupting G3BP1 activity and inhibiting SG formation. Poly(A) binding protein (PABP) and  
514 the eukaryotic translation initiation factors eIF3, eIF4E (4E), and eIF4G (4G) that form preinitiation  
515 complex and recruit ribosomal subunits are shown schematically. EIF2AK = eIF2 $\alpha$  kinase.

## 516 Discussion

517 Despite high prevalence in the population and ability to cause reinfections (57,58), common cold human  
518 coronaviruses remained poorly studied due to lower clinical significance compared to other seasonal  
519 respiratory viruses like influenza or respiratory syncytial virus (RSV). With the emergence of highly  
520 pathogenic coronaviruses of zoonotic origin, especially the recent pandemic CoV2 that swept the globe  
521 causing high morbidity and mortality, the interest in coronavirus research increased. Due to its  
522 classification as level 2 pathogen, OC43 emerged as one of the model coronaviruses (59–63). In this  
523 study, we examined this viruses' ability to inhibit formation of SGs, one of the intrinsic host antiviral  
524 mechanisms, and compared it to that of the highly pathogenic CoV2.

525 Our work demonstrates that in virus-infected cells SGs do not form until about 24 h post-infection, with  
526 fewer than 5% of cells having SGs at that time point. Despite coronaviruses being known to generate  
527 levels of dsRNA sufficient to be detected by dsRNA-specific antibody (17,64), both OC43 and CoV2 do  
528 not activate PKR to levels that would induce significant eIF2 $\alpha$  phosphorylation and SG formation.

529 Furthermore, both viruses inhibit eIF2 $\alpha$  phosphorylation triggered by As treatment which causes  
530 oxidative stress and activates HRI (65). This indicates that OC43 and CoV2 suppress eIF2 $\alpha$   
531 phosphorylation-dependent translation arrest. The nuclease activity of Nsp15, conserved in coronaviruses  
532 from different genera, was previously shown to be important in limiting dsRNA detection in cells infected  
533 with Gammacoronavirus IBV (17). Infection of cells with a recombinant virus with H238A substitution in  
534 Nsp15 that abrogates its nuclease activity triggered PKR activation, phosphorylation of eIF2 $\alpha$ , and  
535 induction of SGs (17). Thus, it is very likely that Nsp15 activity also contributes to the lack of PKR  
536 activation and SG formation in OC43 and CoV2 infected cells. Despite this, in our experimental system,  
537 overexpression of OC43 Nsp15 did not significantly affect As-induced eIF2 $\alpha$  phosphorylation or SG  
538 formation. In another study, CoV2 N and the 3CLpro proteinase Nsp5 were shown to suppress SGs  
539 induced by transfection with the dsRNA mimic polyinosinic-polycytidylic acid (poly(I:C)) (34).  
540 However, the effects of these proteins on poly(I:C)-induced PKR activation and eIF2 $\alpha$  phosphorylation  
541 were not examined. Previous studies have demonstrated that CoV2 N protein directly binds G3BP1 and  
542 interferes with its function in SG nucleation (33,34). Consistent with this mechanism, upon ectopic  
543 overexpression, CoV2 N protein blocked both phospho-eIF2 $\alpha$  dependent and independent SG formation  
544 in our study. In comparison, the OC43 N protein was also able to inhibit SGs but was better at inhibiting  
545 phospho-eIF2 $\alpha$  independent SGs induced by Sil. than the SGs induced by As. Despite these differences in  
546 magnitude, our results show that inhibition of SG nucleation by N protein is conserved between OC43  
547 and CoV2. Notably, neither N protein affected As-induced eIF2 $\alpha$  phosphorylation, confirming that they  
548 function downstream at the SG nucleation step. Instead, our work revealed that OC43 and CoV2 Nsp1  
549 host shutoff factors are responsible, at least in part, for inhibition of eIF2 $\alpha$  phosphorylation observed in  
550 As-treated infected cells. Upon ectopic overexpression, OC43 and CoV2 Nsp1 proteins inhibited eIF2 $\alpha$   
551 phosphorylation and SG formation induced by As. Importantly, OC43 Nsp1 did not significantly inhibit  
552 Sil.-induced SG formation, indicating that inhibition of p-eIF2 $\alpha$  mediated translation arrest is the main  
553 mechanism of SG inhibition by this protein. By contrast, CoV2 Nsp1 was also able to inhibit Sil.-induced  
554 SG formation, although to a much lesser extent compared to As-induced SGs. Since virus infections or



555 CoV2 or OC43 Nsp1 overexpression did not affect total eIF2 $\alpha$  levels in our experiments, suppression of  
556 eIF2 $\alpha$  phosphorylation by Nsp1 could be through direct inhibition of a specific kinase (e.g. HRI) or  
557 through stimulation of eIF2 $\alpha$  dephosphorylation. It is important to note, however, that our results do not  
558 rule out the contribution of other viral proteins to suppression of eIF2 $\alpha$  phosphorylation in infected cells.

559 Another striking phenotype that we observed in CoV2 but not OC43 infected cells was the depletion of  
560 G3BP1 protein and increase in nuclear retention of TIAR. Our analysis using translation inhibitors  
561 revealed that G3BP1 protein is not intrinsically unstable, indicating that general inhibition of protein  
562 synthesis by CoV2 host shutoff is not responsible for G3BP1 depletion. Instead, we discovered that  
563 G3BP1 levels can be decreased by transcription inhibitor ActD. This suggests a link between general  
564 cytoplasmic mRNA depletion by CoV2 host shutoff factor Nsp1 and the sharp decrease in G3BP1 protein  
565 levels. Indeed, upon ectopic overexpression, CoV2 Nsp1 caused depletion of G3BP1 protein level. By  
566 contrast, OC43 Nsp1, which does not induce mRNA degradation, did not affect G3BP1 expression. To  
567 firmly link G3BP1 protein depletion and nuclear TIAR accumulation to mRNA degradation induced by  
568 CoV2 Nsp1, we created and tested two amino acid substitution mutants that were previously shown to be  
569 defective in stimulating host mRNA degradation – single amino acid substitution R99A in the Nsp1 N-  
570 terminal domain, and double substitution R124A,K125A in the linker region (42). Neither mutant caused  
571 decrease in host mRNA levels nor affected G3BP1 protein levels or nuclear TIAR accumulation, similar  
572 to OC43 Nsp1.

573 G3BP1 protein and its homologue G3BP2 are master regulators of SG formation that can directly interact  
574 with the small ribosomal subunit and facilitate initial nucleation of SGs (26,55,66). Consequently, most  
575 types of stress fail to induce SG formation in G3BP1/G3BP2 double knock-out cells (26,66).

576 Interestingly, despite partially overlapping functions, silencing of either G3BP1 or G3BP2 can inhibit  
577 both phospho-eIF2 $\alpha$  dependent and independent SG formation, suggesting that the total levels of  
578 G3BP1/G3BP2 expression affect SG nucleation (26,56,67). In addition, G3BP1 protein is involved in  
579 antiviral responses through multiple mechanisms (29,68–70). It can amplify translation arrest by

580 recruiting unphosphorylated PKR to stress granules, where it becomes activated in a dsRNA-independent  
581 manner (29). It is also involved in the activation of signaling cascades leading to induction of antiviral  
582 cytokines (29,70), and many studies have shown that silencing of G3BP1 leads to impaired induction of  
583 type I interferon (27,29,71). Recently, it was discovered that G3BP1 and G3BP2 function in anchoring  
584 the tuberous sclerosis complex (TSC) to lysosomes and suppressing activation of the mechanistic target  
585 of rapamycin complex 1 (mTORC1) (72). These functions of G3BP1 are independent from SG formation.  
586 Thus, in addition to interfering with SG nucleation, depletion of G3BP1 in CoV2 infected cells could  
587 benefit viral replication by both blunting the cellular innate immune responses and by upregulating  
588 biosynthetic pathways through relieving mTORC1 suppression. In our study we showed that  
589 overexpression of G3BP1 inhibits OC43 infection without increasing SG formation, suggesting that  
590 G3BP1 is antiviral towards OC43 and that some of the SG nucleation-independent functions of G3BP1  
591 could be responsible.

592 Existence of multiple mechanisms that interfere with translation arrest and SG formation in cells infected  
593 with both the seasonal common cold OC43 and the pandemic CoV2 viruses described in this study  
594 highlights the importance of overcoming these antiviral mechanisms by diverse coronaviruses. In  
595 addition, our work discovers a novel feature of Nsp1-mediated host shutoff that simultaneously blocks  
596 host translation initiation and promotes continuous regeneration of GTP-bound translation initiation-  
597 competent eIF2 by inhibiting eIF2 $\alpha$  phosphorylation. In the follow up work focusing on CoV2 and OC43  
598 Nsp1, we aim at characterizing the mechanism by which these host shutoff factors inhibit eIF2 $\alpha$   
599 phosphorylation and the contribution of this function to viral replication fitness and suppression of host  
600 antiviral responses.

## 601 **Materials and Methods**

### 602 **Cells**

603 Human Embryonic Kidney (HEK) 293A cells and human colon adenocarcinoma (HCT-8) cells were  
604 cultured in Dulbecco's modified Eagle's medium (DMEM) supplemented with heat-inactivated 10% fetal  
605 bovine serum (FBS), and 2 mM L-glutamine (all purchased from Thermo Fisher Scientific (Thermo),  
606 Waltham, MA, USA). BEAS-2B cells were cultured in Bronchial Epithelial Cell Growth Medium  
607 (BEGM, Lonza, Kingston, ON, Canada) on plates prepared with coating media (0.01 mg/ml fibronectin,  
608 0.03 mg/mL bovine collagen type I, and 0.01 mg/ml bovine serum albumin (all from Millipore Sigma,  
609 Oakville, ON, Canada) dissolved in Basal Epithelial Cell Growth Medium (BEBM, Lonza)). 293A and  
610 BEAS-2B cells were purchased from American Type Culture Collection (ATCC, Manassas, VA, USA),  
611 HCT-8 cells were purchased from Millipore Sigma.

## 612 **Viruses**

613 HCoV-OC43 was purchased from ATCC and SARS-CoV2 (strain SARS-CoV-2/SB3-TYAGNC) was  
614 derived from a clinical isolate and generously provided by Drs. Arinjay Banerjee, Karen Mossman and  
615 Samira Mubareka (73). To generate initial HCoV-OC43 virus stocks, Vero E6 cells (ATCC) were  
616 infected at multiplicity of infection (MOI) <0.1 for 1 h in serum-free DMEM at 37°C following  
617 replacement of the inoculum with DMEM supplemented with 1% FBS and continued incubation at 33°C.  
618 Once CPE reached 75% at 4-5 d post-infection, the viral supernatant was harvested, centrifuged at 2,500 x  
619 g for 5 min, and then the cleared viral supernatant was aliquoted and stored at -80°C. For SARS-CoV-2  
620 stocks, Vero E6 cells in a confluent T-175 cm<sup>2</sup> flask were infected at a MOI of 0.01 for 1 h at 37°C in 2.5  
621 mL of serum-free DMEM with intermittent shaking every 10 min. Following incubation, 17.5 ml of  
622 DMEM supplemented with 2% FBS was added directly to the viral inoculum and continued incubation at  
623 37°C. With the onset of CPE at 62 – 66 hpi, viral supernatant was harvested, centrifuged at 1,000 x g for  
624 5 min, and then the cleared viral supernatant was aliquoted and stored at -80°C. Stocks were titered by  
625 plaque assay on Vero E6 cells as in (74).

## 626 **Plasmids and lentivirus stocks**

627 SARS-CoV2 and HCoV-OC43 N, Nsp1, and Nsp15 open reading frames were PCR-amplified from  
628 cDNAs generated from total RNA of infected Vero E6 cells collected at 24 hpi using specific primers  
629 with simultaneous introduction of flanking restriction sites. Then, coding sequences were inserted  
630 between EcoRI and XhoI sites into pCR3.1-EGFP vector (75) to generate pCR3.1-EGFP-OC43-N,  
631 pCR3.1-EGFP-CoV2-N, pCR3.1-EGFP-OC43-Nsp1, pCR3.1-EGFP-CoV2-Nsp1, and pCR3.1-EGFP-  
632 OC43-Nsp15 plasmids. To generate N-terminally HA-tagged Nsp1 constructs, coding sequences were  
633 inserted between KpnI and XhoI sites into 3xHA-miniTurbo-NLS\_pCDNA3 vector (a gift from Alice  
634 Ting, Addgene plasmid # 107172) to generate pCDNA3-HA-OC43-Nsp1 and pCDNA3-HA-CoV2-Nsp1  
635 vectors (miniTurbo-NLS coding sequence was replaced by Nsp1 sequences). Amino acid substitutions in  
636 pCDNA3-HA-CoV2-Nsp1 vector were introduced using Phusion PCR mutagenesis (New England  
637 Biolabs) to generate pCDNA-HA-CoV2-Nsp1(R99A) and pCDNA-HA-CoV2-Nsp1(R124A,K125A)  
638 vectors. To generate lentivirus vectors pLJM1-ACE2-BSD, pLJM1-EGFP-BSD, and pLJM1-EGFP-  
639 G3BP1-BSD, the PCR-amplified ACE2, EGFP, and G3BP1 coding sequences were inserted into the  
640 multicloning site of pLJM1-B\* vector (76). All constructs were verified by Sanger sequencing, sequences  
641 are available upon request. To generate lentivirus stocks, HEK 293T cells (ATCC) were reverse-  
642 transfected with polyethylenimine (PEI, Polysciences, Warrington, PA, USA) and the following plasmids  
643 for lentiviral generation: pLJM1-B\* backbone-based constructs, pMD2.G, and psPAX2. pMD2.G and  
644 psPAX2 are gifts from Didier Trono (Addgene plasmids #12259 and #12260). 48 h post-transfection,  
645 lentivirus containing supernatants were passed through a 0.45  $\mu$ m filter and frozen at -80°C.

#### 646 **Generation of stably transduced cell lines**

647 To generate 293A-ACE2 cells, 293A cells were stably transduced with a lentivirus vector encoding ACE2  
648 (pLJM1-ACE2-BSD) and selected and maintained in 10  $\mu$ g/mL Blasticidin S HCl (Thermo Fisher). To  
649 generate 293A[EGFP] and 293A[EGFP-G3BP1] cells, 293A cells were transduced with lentiviruses  
650 produced from pLJM1-EGFP-BSD and pLJM1-EGFP-G3BP1-BSD vectors and at passage 3 post-

651 transduction, EGFP-positive cells were isolated using live cell sorting on BD FACSAria III instrument,  
652 cultured and used for experiments at passage 5 to 6.

### 653 **Cell treatments**

654 For SG induction, sodium arsenite (Millipore Sigma) was added to the media to a final concentration of  
655 500  $\mu$ M and cells were returned to 37°C incubator for 50 min; Silvestrol (MedChemExpress, Monmouth  
656 Junction, NJ, USA) was added to the media to a final concentration of 500 nM and cells were returned to  
657 37°C incubator for 1 h. For treatment of 293A cells with translation and transcription inhibitors,  
658 cycloheximide (50  $\mu$ g/ml), Actinomycin D (5  $\mu$ g/ml), or Silvestrol (320 nM) were added to the media and  
659 cells were incubated for 12h prior to lysis for western blot.

### 660 **Virus infections**

661 Cell monolayers were grown in 20-mm wells of 12-well cluster dishes with or without glass coverslips.  
662 For HCoV-OC43 infections, media was aspirated, cells were washed briefly with PBS and 300  $\mu$ l of virus  
663 inoculum diluted to the calculated MOI = 1.0 in 1% FBS DMEM was added. Cells were placed at 37°C  
664 for 1 h, with manual horizontal shaking every 10-15 minutes. Then, virus inoculum was aspirated from  
665 cells, cells were washed with PBS, 1 ml of fresh 1% FBS DMEM was added to each well, and cells were  
666 returned to 37°C until the specified time post-infection. For SARS-CoV-2 infections, media was aspirated  
667 and 100  $\mu$ L of virus inoculum diluted in serum-free DMEM at a MOI of 0.2 was added directed to the  
668 wells. Cells were incubated at 37°C for 1h with intermittent shaking every 10 min. Following incubation,  
669 virus inoculum was removed, and cells were washed with 1 mL of PBS three times, then 1 mL of fresh  
670 DMEM supplemented with 10% FBS was added to each well. Cells were incubated at 37°C for 24 h.

### 671 **Transfection**

672 293A cells were seeded into 20-mm wells of 12-well cluster dishes with or without glass coverslips and  
673 the next day transfected with 500 ng DNA mixes/well containing expression vectors (250 ng) and pUC19  
674 filler DNA (250 ng) using Fugene HD (Promega, Madison, WI, USA) according to manufacturer's

675 protocol. Where indicated, the amount of filler DNA was reduced to 150 ng and 100 ng of the pCR3.1-  
676 EGFP plasmid was co-transfected with expression vectors for Nsp1 proteins. Cells were used for  
677 experiments 23-24 h post-transfection as indicated.

### 678 **Immunofluorescence staining**

679 Cell fixation and immunofluorescence staining were performed according to the procedure described in  
680 (56). Briefly, cells grown on 18-mm round coverslips were fixed with 4% paraformaldehyde in PBS for  
681 15 min at ambient temperature and permeabilized with cold methanol for 10 min. After 1-h blocking with  
682 5% bovine serum albumin (BSA, BioShop, Burlington, ON, Canada) in PBS, staining was performed  
683 overnight at +4°C with antibodies to the following targets: CoV2 N (1:400; rabbit, Novus Biologicals,  
684 NBP3-05730); eIF3B (1:400; rabbit, Bethyl Labs, A301761A); eIF4G (1:200; rabbit, Cell Signaling,  
685 #2498); G3BP1 (1:400; mouse, BD Transduction, 611126); G3BP2 (1:1000; rabbit, Millipore Sigma,  
686 HPA018304); HA tag (1:100; mouse, Cell Signalling, #2367); OC43 N (1:500; mouse, Millipore,  
687 MAB9012); TIA-1 (1:200; goat, Santa Cruz Biotechnology, sc-1751); TIAR (1:1000; rabbit, Cell  
688 Signaling, #8509). Alexa Fluor (AF)-conjugated secondary antibodies used were: donkey anti-mouse IgG  
689 AF488 (Invitrogen, A21202), donkey anti-rabbit IgG AF555 (Invitrogen, A31572), donkey anti-goat IgG  
690 AF647 (Invitrogen, A32839). Where indicated, nuclei were stained with Hoechst 33342 dye (Invitrogen,  
691 H3570). Slides were mounted with ProLong Gold Antifade Mountant (Thermo Fisher) and imaged using  
692 Zeiss AxioImager Z2 fluorescence microscope and Zeiss ZEN 2011 software. Green, red, blue, and far-  
693 red channel colors were changed for image presentation in the color-blind safe palette without altering  
694 signal levels. Quantification of SG-positive cells was performed by counting the number of cells with at  
695 least two discrete cytoplasmic foci from at least 3 randomly selected fields of view, analysing >100 cells  
696 per treatment in each replicate. Analysis of SG number and size was performed on cropped images of  
697 individual cells using ImageJ software Analyze Particles function after automatic background  
698 subtraction and thresholding. For each of 3 independent biological replicates, 7 cells selected from at  
699 least 3 random fields of view were analyzed for a total of 21 cells per condition.

## 700 **Western blotting**

701 Whole-cell lysates were prepared by direct lysis of PBS-washed cell monolayers with 1× Laemmli  
702 sample buffer (50 mM Tris-HCl pH 6.8, 10% glycerol, 2% SDS, 100 mM DTT, 0.005% Bromophenol  
703 Blue). Lysates were immediately placed on ice, homogenized by passing through a 21-gauge needle, and  
704 stored at −20°C. Aliquots of lysates thawed on ice were incubated at 95°C for 3 min, cooled on ice,  
705 separated using denaturing PAGE, transferred onto PVDF membranes using Trans Blot Turbo Transfer  
706 System with RTA Transfer Packs (Bio-Rad Laboratories, Hercules, CA, USA) according to  
707 manufacturer’s protocol and analysed by immunoblotting using antibody-specific protocols. Antibodies to  
708 the following targets were used: β-actin (1:2000; HRP-conjugated, mouse, Santa Cruz Biotechnology, sc-  
709 47778); CoV2 N (1:1,000; rabbit, Novus Biologicals, NBP3-05730); eIF2α (1:1000; rabbit, Cell  
710 Signaling, #5324); eIF4G (1:1000; rabbit, Cell Signaling, #2498); G3BP1 (1:4000; mouse, BD  
711 Transduction, 611126); G3BP2 (1:2500; rabbit, Millipore Sigma, HPA018304); GFP (1:1000; rabbit, Cell  
712 Signaling, #2956); HA tag (1:1,000; mouse, Cell Signalling, #2367); OC43 N (1:1,000; mouse, Millipore,  
713 MAB9012); phospho-S51-eIF2α (1:1000; rabbit, Cell Signaling, #3398); TIAR (1:1000; rabbit, Cell  
714 Signaling, #8509). For band visualization, HRP-conjugated anti-rabbit IgG (Goat, Cell Signaling, #7074)  
715 or anti-mouse IgG (Horse, Cell Signaling, #7076) were used with Clarity Western ECL Substrate on the  
716 ChemiDoc Touch Imaging System (Bio-Rad Laboratories). Where indicated, total protein was visualised  
717 post-transfer to PVDF membranes on ChemiDoc using Stain-free fluorescent dye (Bio-Rad Laboratories).  
718 For analyses of protein band intensities, western blot signals were quantified using Bio-Rad Image Lab  
719 5.2.1 software and values normalized to the Stain-free signal for each lane.

## 720 **Ribopuromylation assay**

721 The puromycin incorporation assay was performed as described in (77) with the following modifications.  
722 Puromycin was added to the medium at the final concentration of 10 µg/ml for 10 min. Cells were washed  
723 with PBS and the whole-cell lysate preparation and western blotting analysis were done as described  
724 above. For electrophoresis, samples were loaded onto Mini-PROTEAN TGX Pre-cast Stain-Free gels (5-



725 15%, BioRad Laboratories, Hercules, CA, USA) and total protein was visualised post-transfer to PVDF  
726 membranes on ChemiDoc Touch Imaging System. Puromycin incorporation into nascent polypeptides  
727 was visualised using anti-puromycin antibody (1:6,000; mouse, MilliporeSigma, MABE343).

## 728 **RNA isolation and RT-QPCR**

729 Total RNA was isolated from cells using RNeasy Plus Mini kit (Qiagen) according to manufacturer's  
730 protocol. 250 ng of RNA was used to synthesize cDNA using qScript cDNA SuperMix (Quanta) or  
731 Maxima H Minus Reverse Transcriptase (Thermo Fisher). Quantitative PCR amplification was performed  
732 using PerfeCTa SYBR Green PCR master mix (Quanta) and specific primers listed below on Cielo 3  
733 QPCR unit (Azure). Primers used: 18S - Left: cgttcttagttggtggagcg, Right: ccggacatctaaggcatca; ACTB -  
734 Left: catccgcaaagacctgtacg, Right: cctgcttgctgatccatc; G3BP1 - Left: ggtcttaggcgtgtaccctg, Right:  
735 tatcgggaggaccctcagtg; G3BP2 - Left: gcctgttaatgctgggaacac, Right: tgttgctcctgttgcatg; TIAR - Left:  
736 tggagatgcagaagaccgag, Right: tgcactccctagctctgaca. Relative target levels were determined using  $\Delta\Delta Ct$   
737 method with normalization to 18S.

## 738 **Statistical analyses**

739  
740 All numerical values are plotted as means (bar graphs) and display individual datapoints representing  
741 independent biological replicates (separate experiments performed on different days); the error bars  
742 represent standard deviations. Statistical analyses for each data set are described in figure legends and  
743 were performed using GraphPad Prism 8 software.

744

## 745 **Acknowledgements**

746 We would like to thank Dr. Arinjay Banerjee (Vaccine and Infectious Disease Organization (VIDO)), Dr.  
747 Karen Mossman (University of McMaster) and Dr. Samira Mubareka (University of Toronto) for the  
748 SARS-CoV-2 isolate. We also thank Dalhousie CORES Flow Cytometry Facility for assistance in



749 generating stable cell lines expressing EGFP-G3BP1 and EGFP. Finally, we thank members of  
750 Khaperskyy and Corcoran labs for helpful discussions about experimental design and their critical input  
751 on the draft manuscript. This work was supported by Canadian Institutes for Health Research (CIHR)  
752 Project Grant PJT-175130 and Research Nova Scotia Grant RNS-NHIG-2020-1383 (to D.K.). This study  
753 was also supported in part by operating funds awarded to JAC from the Canadian Institutes for Health  
754 Research (CIHR): a COVID rapid response operating grant (#177704) and an operating grant (#175622)  
755 the Coronavirus Variants Rapid Response Network (CoVaRR-Net), of which JAC is a member. MK was  
756 supported by a CSM graduate training award and a CIHR doctoral award.

## 757 **References**

- 758 1. Hartenian E, Nandakumar D, Lari A, Ly M, Tucker JM, Glaunsinger BA. The molecular virology of  
759 coronaviruses. *J Biol Chem*. 2020 Sep 11;295(37):12910–34.
- 760 2. Chazal N. Coronavirus, the King Who Wanted More Than a Crown: From Common to the Highly  
761 Pathogenic SARS-CoV-2, Is the Key in the Accessory Genes? *Front Microbiol* [Internet]. 2021  
762 [cited 2022 Apr 17];12. Available from:  
763 <https://www.frontiersin.org/article/10.3389/fmicb.2021.682603>
- 764 3. Blanco-Melo D, Nilsson-Payant BE, Liu WC, Uhl S, Møller R, Jordan TX, et al. Imbalanced host  
765 response to SARS-CoV-2 drives development of. *Cell*. 2020;46.
- 766 4. Zhu N, Zhang D, Wang W, Li X, Yang B, Song J, et al. A Novel Coronavirus from Patients with  
767 Pneumonia in China, 2019. *N Engl J Med*. 2020 Feb 20;382(8):727–33.
- 768 5. Fung TS, Liu DX. Human Coronavirus: Host-Pathogen Interaction. *Annu Rev Microbiol*. 2019 Sep  
769 8;73(1):529–57.
- 770 6. Ziebuhr J. The Coronavirus Replicase. In: Enjuanes L, editor. *Coronavirus Replication and Reverse*  
771 *Genetics* [Internet]. Berlin, Heidelberg: Springer; 2005 [cited 2020 Sep 26]. p. 57–94. (Current

- 772 Topics in Microbiology and Immunology). Available from: [https://doi.org/10.1007/3-540-26765-](https://doi.org/10.1007/3-540-26765-4_3)  
773 4\_3
- 774 7. Thiel V, Ivanov KA, Putics Á, Hertzog T, Schelle B, Bayer S, et al. Mechanisms and enzymes  
775 involved in SARS coronavirus genome expression. *J Gen Virol*. 2003 Sep 1;84(9):2305–15.
- 776 8. Brian DA, Baric RS. Coronavirus genome structure and replication. *Curr Top Microbiol Immunol*.  
777 2005;287:1–30.
- 778 9. Gorbalenya AE, Snijder EJ, Ziebuhr J. Virus-encoded proteinases and proteolytic processing in the  
779 Nidovirales. *J Gen Virol*. 2000 Apr 1;81(4):853–79.
- 780 10. Li F. Structure, Function, and Evolution of Coronavirus Spike Proteins. *Annu Rev Virol*. 2016 Sep  
781 29;3(1):237–61.
- 782 11. Künkel F, Herrler G. Structural and functional analysis of the surface protein of human coronavirus  
783 OC43. *Virology*. 1993 Jul;195(1):195–202.
- 784 12. Hoffmann M, Kleine-Weber H, Schroeder S, Krüger N, Herrler T, Erichsen S, et al. SARS-CoV-2  
785 Cell Entry Depends on ACE2 and TMPRSS2 and Is Blocked by a Clinically Proven Protease  
786 Inhibitor. *Cell*. 2020 Apr 16;181(2):271-280.e8.
- 787 13. Li W, Moore MJ, Vasilieva N, Sui J, Wong SK, Berne MA, et al. Angiotensin-converting enzyme 2  
788 is a functional receptor for the SARS coronavirus. *Nature*. 2003 Nov 27;426(6965):450–4.
- 789 14. Setaro AC, Gaglia MM. All hands on deck: SARS-CoV-2 proteins that block early anti-viral  
790 interferon responses. *Curr Res Virol Sci*. 2021;2:100015.
- 791 15. McCormick C, Khapersky DA. Translation inhibition and stress granules in the antiviral immune  
792 response. *Nat Rev Immunol*. 2017 Jun 26;17(10):647–60.

- 793 16. Kint J, Langereis MA, Maier HJ, Britton P, van Kuppeveld FJ, Koumans J, et al. Infectious  
794 Bronchitis Coronavirus Limits Interferon Production by Inducing a Host Shutoff That Requires  
795 Accessory Protein 5b. *J Virol*. 2016 15;90(16):7519–28.
- 796 17. Gao B, Gong X, Fang S, Weng W, Wang H, Chu H, et al. Inhibition of anti-viral stress granule  
797 formation by coronavirus endoribonuclease nsp15 ensures efficient virus replication. Thiel V,  
798 editor. *PLOS Pathog*. 2021 Feb 26;17(2):e1008690.
- 799 18. Reikine S, Nguyen JB, Modis Y. Pattern Recognition and Signaling Mechanisms of RIG-I and  
800 MDA5. *Front Immunol*. 2014;5:342.
- 801 19. Stetson DB, Medzhitov R. Type I interferons in host defense. *Immunity*. 2006 Sep;25(3):373–81.
- 802 20. García MA, Meurs EF, Esteban M. The dsRNA protein kinase PKR: virus and cell control.  
803 *Biochimie*. 2007 Jul;89(6–7):799–811.
- 804 21. Jackson RJ, Hellen CUT, Pestova TV. The mechanism of eukaryotic translation initiation and  
805 principles of its regulation. *Nat Rev Mol Cell Biol*. 2010 Feb;11(2):113–27.
- 806 22. Kedersha N, Chen S, Gilks N, Li W, Miller IJ, Stahl J, et al. Evidence That Ternary Complex (eIF2-  
807 GTP-tRNA<sup>iMet</sup>)–Deficient Preinitiation Complexes Are Core Constituents of Mammalian Stress  
808 Granules. *Mol Biol Cell*. 2002 Jan;13(1):195–210.
- 809 23. Kedersha N, Ivanov P, Anderson P. Stress granules and cell signaling: more than just a passing  
810 phase? *Trends Biochem Sci*. 2013 Oct;38(10):494–506.
- 811 24. Protter DSW, Parker R. Principles and Properties of Stress Granules. *Trends Cell Biol*. 2016  
812 Sep;26(9):668–79.

- 813 25. Kedersha NL, Gupta M, Li W, Miller I, Anderson P. RNA-binding proteins TIA-1 and TIAR link  
814 the phosphorylation of eIF-2 alpha to the assembly of mammalian stress granules. *J Cell Biol.* 1999  
815 Dec 27;147(7):1431–42.
- 816 26. Kedersha N, Panas MD, Achorn CA, Lyons S, Tisdale S, Hickman T, et al. G3BP–Caprin1–USP10  
817 complexes mediate stress granule condensation and associate with 40S subunits. *J Cell Biol.* 2016  
818 Mar 28;212(7):845–60.
- 819 27. Onomoto K, Jogi M, Yoo JS, Narita R, Morimoto S, Takemura A, et al. Critical role of an antiviral  
820 stress granule containing RIG-I and PKR in viral detection and innate immunity. *PloS One.*  
821 2012;7(8):e43031.
- 822 28. Yoo JS, Takahasi K, Ng CS, Ouda R, Onomoto K, Yoneyama M, et al. DHX36 enhances RIG-I  
823 signaling by facilitating PKR-mediated antiviral stress granule formation. *PLoS Pathog.* 2014  
824 Mar;10(3):e1004012.
- 825 29. Reineke LC, Lloyd RE. The Stress Granule Protein G3BP1 Recruits Protein Kinase R To Promote  
826 Multiple Innate Immune Antiviral Responses. Sandri-Goldin RM, editor. *J Virol.* 2015 Mar  
827 1;89(5):2575–89.
- 828 30. Khaperskyy DA, Hatchette TF, McCormick C. Influenza A virus inhibits cytoplasmic stress granule  
829 formation. *FASEB J.* 2012 Apr;26(4):1629–39.
- 830 31. Khaperskyy DA, Emara MM, Johnston BP, Anderson P, Hatchette TF, McCormick C. Influenza A  
831 Virus Host Shutoff Disables Antiviral Stress-Induced Translation Arrest. Pekosz A, editor. *PLoS*  
832 *Pathog.* 2014 Jul 10;10(7):e1004217.
- 833 32. Poblete-Durán N, Prades-Pérez Y, Vera-Otarola J, Soto-Rifo R, Valiente-Echeverría F. Who  
834 Regulates Whom? An Overview of RNA Granules and Viral Infections. *Viruses [Internet].* 2016

- 835 Jun 28 [cited 2020 Aug 12];8(7). Available from:  
836 <https://www.ncbi.nlm.nih.gov/pmc/articles/PMC4974515/>
- 837 33. Nabeel-Shah S, Lee H, Ahmed N, Burke GL, Farhangmehr S, Ashraf K, et al. SARS-CoV-2  
838 nucleocapsid protein binds host mRNAs and attenuates stress granules to impair host stress  
839 response. *iScience* [Internet]. 2022 Jan 21 [cited 2022 Jan 4];25(1). Available from:  
840 [https://www.cell.com/iscience/abstract/S2589-0042\(21\)01532-7](https://www.cell.com/iscience/abstract/S2589-0042(21)01532-7)
- 841 34. Zheng Y, Deng J, Han L, Zhuang MW, Xu Y, Zhang J, et al. SARS-CoV-2 NSP5 and N protein  
842 counteract the RIG-I signaling pathway by suppressing the formation of stress granules. *Signal*  
843 *Transduct Target Ther*. 2022 Jan 24;7(1):1–12.
- 844 35. Zheng ZQ, Wang SY, Xu ZS, Fu YZ, Wang YY. SARS-CoV-2 nucleocapsid protein impairs stress  
845 granule formation to promote viral replication. *Cell Discov*. 2021 May 25;7(1):1–11.
- 846 36. Frazier MN, Dillard LB, Krahn JM, Perera L, Williams JG, Wilson IM, et al. Characterization of  
847 SARS2 Nsp15 nuclease activity reveals it's mad about U. *Nucleic Acids Res*. 2021 Sep  
848 27;49(17):10136–49.
- 849 37. Narayanan K, Ramirez SI, Lokugamage KG, Makino S. Coronavirus nonstructural protein 1:  
850 Common and distinct functions in the regulation of host and viral gene expression. *Virus Res*. 2015  
851 Apr;202:89–100.
- 852 38. Lokugamage KG, Narayanan K, Huang C, Makino S. Severe acute respiratory syndrome  
853 coronavirus protein nsp1 is a novel eukaryotic translation inhibitor that represses multiple steps of  
854 translation initiation. *J Virol*. 2012 Dec;86(24):13598–608.

- 855 39. Thoms M, Buschauer R, Ameismeier M, Koepke L, Denk T, Hirschenberger M, et al. Structural  
856 basis for translational shutdown and immune evasion by the Nsp1 protein of SARS-CoV-2. *Science*.  
857 2020 Sep 4;369(6508):1249–55.
- 858 40. Huang C, Lokugamage KG, Rozovics JM, Narayanan K, Semler BL, Makino S. SARS coronavirus  
859 nsp1 protein induces template-dependent endonucleolytic cleavage of mRNAs: viral mRNAs are  
860 resistant to nsp1-induced RNA cleavage. *PLoS Pathog*. 2011 Dec;7(12):e1002433.
- 861 41. Tanaka T, Kamitani W, DeDiego ML, Enjuanes L, Matsuura Y. Severe acute respiratory syndrome  
862 coronavirus nsp1 facilitates efficient propagation in cells through a specific translational shutoff of  
863 host mRNA. *J Virol*. 2012 Oct;86(20):11128–37.
- 864 42. Mendez AS, Ly M, González-Sánchez AM, Hartenian E, Ingolia NT, Cate JH, et al. The N-terminal  
865 domain of SARS-CoV-2 nsp1 plays key roles in suppression of cellular gene expression and  
866 preservation of viral gene expression. *Cell Rep*. 2021 Oct 19;37(3):109841.
- 867 43. Gerassimovich YA, Miladinovski-Bangall SJ, Bridges KM, Boateng L, Ball LE, Valafar H, et al.  
868 Proximity-dependent biotinylation detects associations between SARS coronavirus nonstructural  
869 protein 1 and stress granule-associated proteins. *J Biol Chem*. 2021 Nov;101399.
- 870 44. Pringle ES, Duguay BA, Bui-Marinos MP, Mulloy RP, Landreth SL, Desiredy KS, et al.  
871 Thiopurines inhibit coronavirus Spike protein processing and incorporation into progeny virions  
872 [Internet]. *bioRxiv*; 2022 [cited 2022 Apr 26]. p. 2022.03.10.483772. Available from:  
873 <https://www.biorxiv.org/content/10.1101/2022.03.10.483772v3>
- 874 45. Jiang SC, Han J, He JW, Chu W. Evaluation of four cell lines for assay of infectious adenoviruses  
875 in water samples. *J Water Health*. 2009 Dec;7(4):650–6.

- 876 46. Mitsuishi M, Masuda S, Kudo I, Murakami M. Group V and X secretory phospholipase A2 prevents  
877 adenoviral infection in mammalian cells. *Biochem J.* 2006 Jan 1;393(Pt 1):97–106.
- 878 47. Yuan J, W. Xu W, Jiang S, Yu H, Fai Poon H. The Scattered Twelve Tribes of HEK293. *Biomed*  
879 *Pharmacol J.* 2018 Jun 28;11(2):621–3.
- 880 48. Mazroui R, Sukarieh R, Bordeleau ME, Kaufman RJ, Northcote P, Tanaka J, et al. Inhibition of  
881 Ribosome Recruitment Induces Stress Granule Formation Independently of Eukaryotic Initiation  
882 Factor 2 $\alpha$  Phosphorylation. *Mol Biol Cell.* 2006 Oct;17(10):4212–9.
- 883 49. Slaine PD, Kleer M, Smith NK, Khapersky DA, McCormick C. Stress Granule-Inducing  
884 Eukaryotic Translation Initiation Factor 4A Inhibitors Block Influenza A Virus Replication.  
885 *Viruses.* 2017 Dec;9(12):388.
- 886 50. Byun WG, Lee J, Kim S, Park SB. Harnessing stress granule formation by small molecules to  
887 inhibit the cellular replication of SARS-CoV-2. *Chem Commun.* 2021 Nov 23;57(93):12476–9.
- 888 51. Ciccocanti F, Di Rienzo M, Romagnoli A, Colavita F, Refolo G, Castilletti C, et al. Proteomic  
889 analysis identifies the RNA helicase DDX3X as a host target against SARS-CoV-2 infection.  
890 *Antiviral Res.* 2021 Jun;190:105064.
- 891 52. Gordon DE, Hiatt J, Bouhaddou M, Rezelj VV, Ulferts S, Braberg H, et al. Comparative host-  
892 coronavirus protein interaction networks reveal pan-viral disease mechanisms. *Science.* 2020 Dec  
893 4;370(6521):eabe9403.
- 894 53. Kruse T, Benz C, Garvanska DH, Lindqvist R, Mihalic F, Coscia F, et al. Large scale discovery of  
895 coronavirus-host factor protein interaction motifs reveals SARS-CoV-2 specific mechanisms and  
896 vulnerabilities. *Nat Commun.* 2021 Nov 19;12(1):6761.



- 897 54. Schubert K, Karousis ED, Jomaa A, Scaiola A, Echeverria B, Gurzeler LA, et al. SARS-CoV-2  
898 Nsp1 binds the ribosomal mRNA channel to inhibit translation. *Nat Struct Mol Biol.* 2020  
899 Oct;27(10):959–66.
- 900 55. Tourrière H, Chebli K, Zekri L, Courselaud B, Blanchard JM, Bertrand E, et al. The RasGAP-  
901 associated endoribonuclease G3BP assembles stress granules. *J Cell Biol.* 2003 Mar 17;160(6):823–  
902 31.
- 903 56. Ying S, Khaperskyy DA. UV damage induces G3BP1-dependent stress granule formation that is not  
904 driven by translation arrest via mTOR inhibition. *J Cell Sci.* 2020 Sep 28;
- 905 57. Lin P, Wang M, Wei Y, Kim T, Wei X. Coronavirus in human diseases: Mechanisms and advances  
906 in clinical treatment. *MedComm.* 2020 Oct 1;
- 907 58. Galanti M, Shaman J. Direct Observation of Repeated Infections With Endemic Coronaviruses. *J*  
908 *Infect Dis.* 2021 Feb 13;223(3):409–15.
- 909 59. Raymonda MH, Ciesla JH, Monaghan M, Leach J, Asantewaa G, Smorodintsev-Schiller LA, et al.  
910 Pharmacologic profiling reveals lapatinib as a novel antiviral against SARS-CoV-2 in vitro.  
911 *Virology.* 2022 Jan;566:60–8.
- 912 60. Liu W, Reyes HM, Yang JF, Li Y, Stewart KM, Basil MC, et al. Activation of STING Signaling  
913 Pathway Effectively Blocks Human Coronavirus Infection. *J Virol.* 2021 May 24;95(12):e00490-21.
- 914 61. Shen L, Niu J, Wang C, Huang B, Wang W, Zhu N, et al. High-Throughput Screening and  
915 Identification of Potent Broad-Spectrum Inhibitors of Coronaviruses. *J Virol.* 2019 Jun  
916 15;93(12):e00023-19.
- 917 62. Duguay BA, Herod A, Pringle ES, Monro SMA, Hetu M, Cameron CG, et al. Photodynamic  
918 Inactivation of Human Coronaviruses. *Viruses.* 2022 Jan 8;14(1):110.

- 919 63. Schirtzinger EE, Kim Y, Davis AS. Improving human coronavirus OC43 (HCoV-OC43) research  
920 comparability in studies using HCoV-OC43 as a surrogate for SARS-CoV-2. *J Virol Methods*. 2022  
921 Jan;299:114317.
- 922 64. Wang J, Han M, Roy AR, Wang H, Möckl L, Zeng L, et al. Multi-color super-resolution imaging to  
923 study human coronavirus RNA during cellular infection. *Cell Rep Methods*. 2022 Feb  
924 28;2(2):100170.
- 925 65. McEwen E, Kedersha N, Song B, Scheuner D, Gilks N, Han A, et al. Heme-regulated Inhibitor  
926 Kinase-mediated Phosphorylation of Eukaryotic Translation Initiation Factor 2 Inhibits Translation,  
927 Induces Stress Granule Formation, and Mediates Survival upon Arsenite Exposure. *J Biol Chem*.  
928 2005 Apr 29;280(17):16925–33.
- 929 66. Cirillo L, Cieren A, Barbieri S, Khong A, Schwager F, Parker R, et al. UBAP2L Forms Distinct  
930 Cores that Act in Nucleating Stress Granules Upstream of G3BP1. *Curr Biol*. 2020  
931 Jan;S096098221931615X.
- 932 67. Tsai WC, Gayatri S, Reineke LC, Sbardella G, Bedford MT, Lloyd RE. Arginine Demethylation of  
933 G3BP1 Promotes Stress Granule Assembly. *J Biol Chem*. 2016 Oct 21;291(43):22671–85.
- 934 68. Zhao M. The stress granule protein G3BP1 promotes pre-condensation of cGAS to allow rapid  
935 responses to DNA. *EMBO Rep*. 2022 Jan 5;23(1):e53166.
- 936 69. Kim SSY, Sze L, Liu C, Lam KP. The stress granule protein G3BP1 binds viral dsRNA and RIG-I  
937 to enhance interferon- $\beta$  response. *J Biol Chem*. 2019 19;294(16):6430–8.
- 938 70. Deater M, Tamhankar M, Lloyd RE. TDRD3 is an antiviral restriction factor that promotes IFN  
939 signaling with G3BP1. *PLOS Pathog*. 2022 Jan 27;18(1):e1010249.

- 940 71. Manivannan P, Siddiqui MA, Malathi K. RNase L Amplifies Interferon Signaling by Inducing  
941 Protein Kinase R-Mediated Antiviral Stress Granules. Williams BRG, editor. *J Virol*. 2020 Apr  
942 15;94(13):e00205-20, /jvi/94/13/JVI.00205-20.atom.
- 943 72. Prentzell MT, Rehbein U, Cadena Sandoval M, De Meulemeester AS, Baumeister R, Brohée L, et  
944 al. G3BPs tether the TSC complex to lysosomes and suppress mTORC1 signaling. *Cell*. 2021  
945 Jan;S0092867420316949.
- 946 73. Banerjee A, Nasir JA, Budyłowski P, Yip L, Aftanas P, Christie N, et al. Isolation, Sequence,  
947 Infectivity, and Replication Kinetics of Severe Acute Respiratory Syndrome Coronavirus 2. *Emerg*  
948 *Infect Dis*. 2020 Sep;26(9):2054–63.
- 949 74. Kleer M, Mulloy RP, Robinson CA, Evseev D, Bui-Marinis MP, Castle EL, et al. Human  
950 coronaviruses disassemble processing bodies [Internet]. *bioRxiv*; 2022 [cited 2022 Apr 26]. p.  
951 2020.11.08.372995. Available from:  
952 <https://www.biorxiv.org/content/10.1101/2020.11.08.372995v3>
- 953 75. Khaperskyy DA, Schmaling S, Larkins-Ford J, McCormick C, Gaglia MM. Selective Degradation  
954 of Host RNA Polymerase II Transcripts by Influenza A Virus PA-X Host Shutoff Protein. Palese P,  
955 editor. *PLOS Pathog*. 2016 Feb 5;12(2):e1005427.
- 956 76. Johnston BP, Pringle ES, McCormick C. KSHV activates unfolded protein response sensors but  
957 suppresses downstream transcriptional responses to support lytic replication. *PLoS Pathog*. 2019  
958 Dec;15(12):e1008185.
- 959 77. Panas MD, Kedersha N, McInerney GM. Methods for the characterization of stress granules in virus  
960 infected cells. *Methods*. 2015 Nov 15;90:57–64.



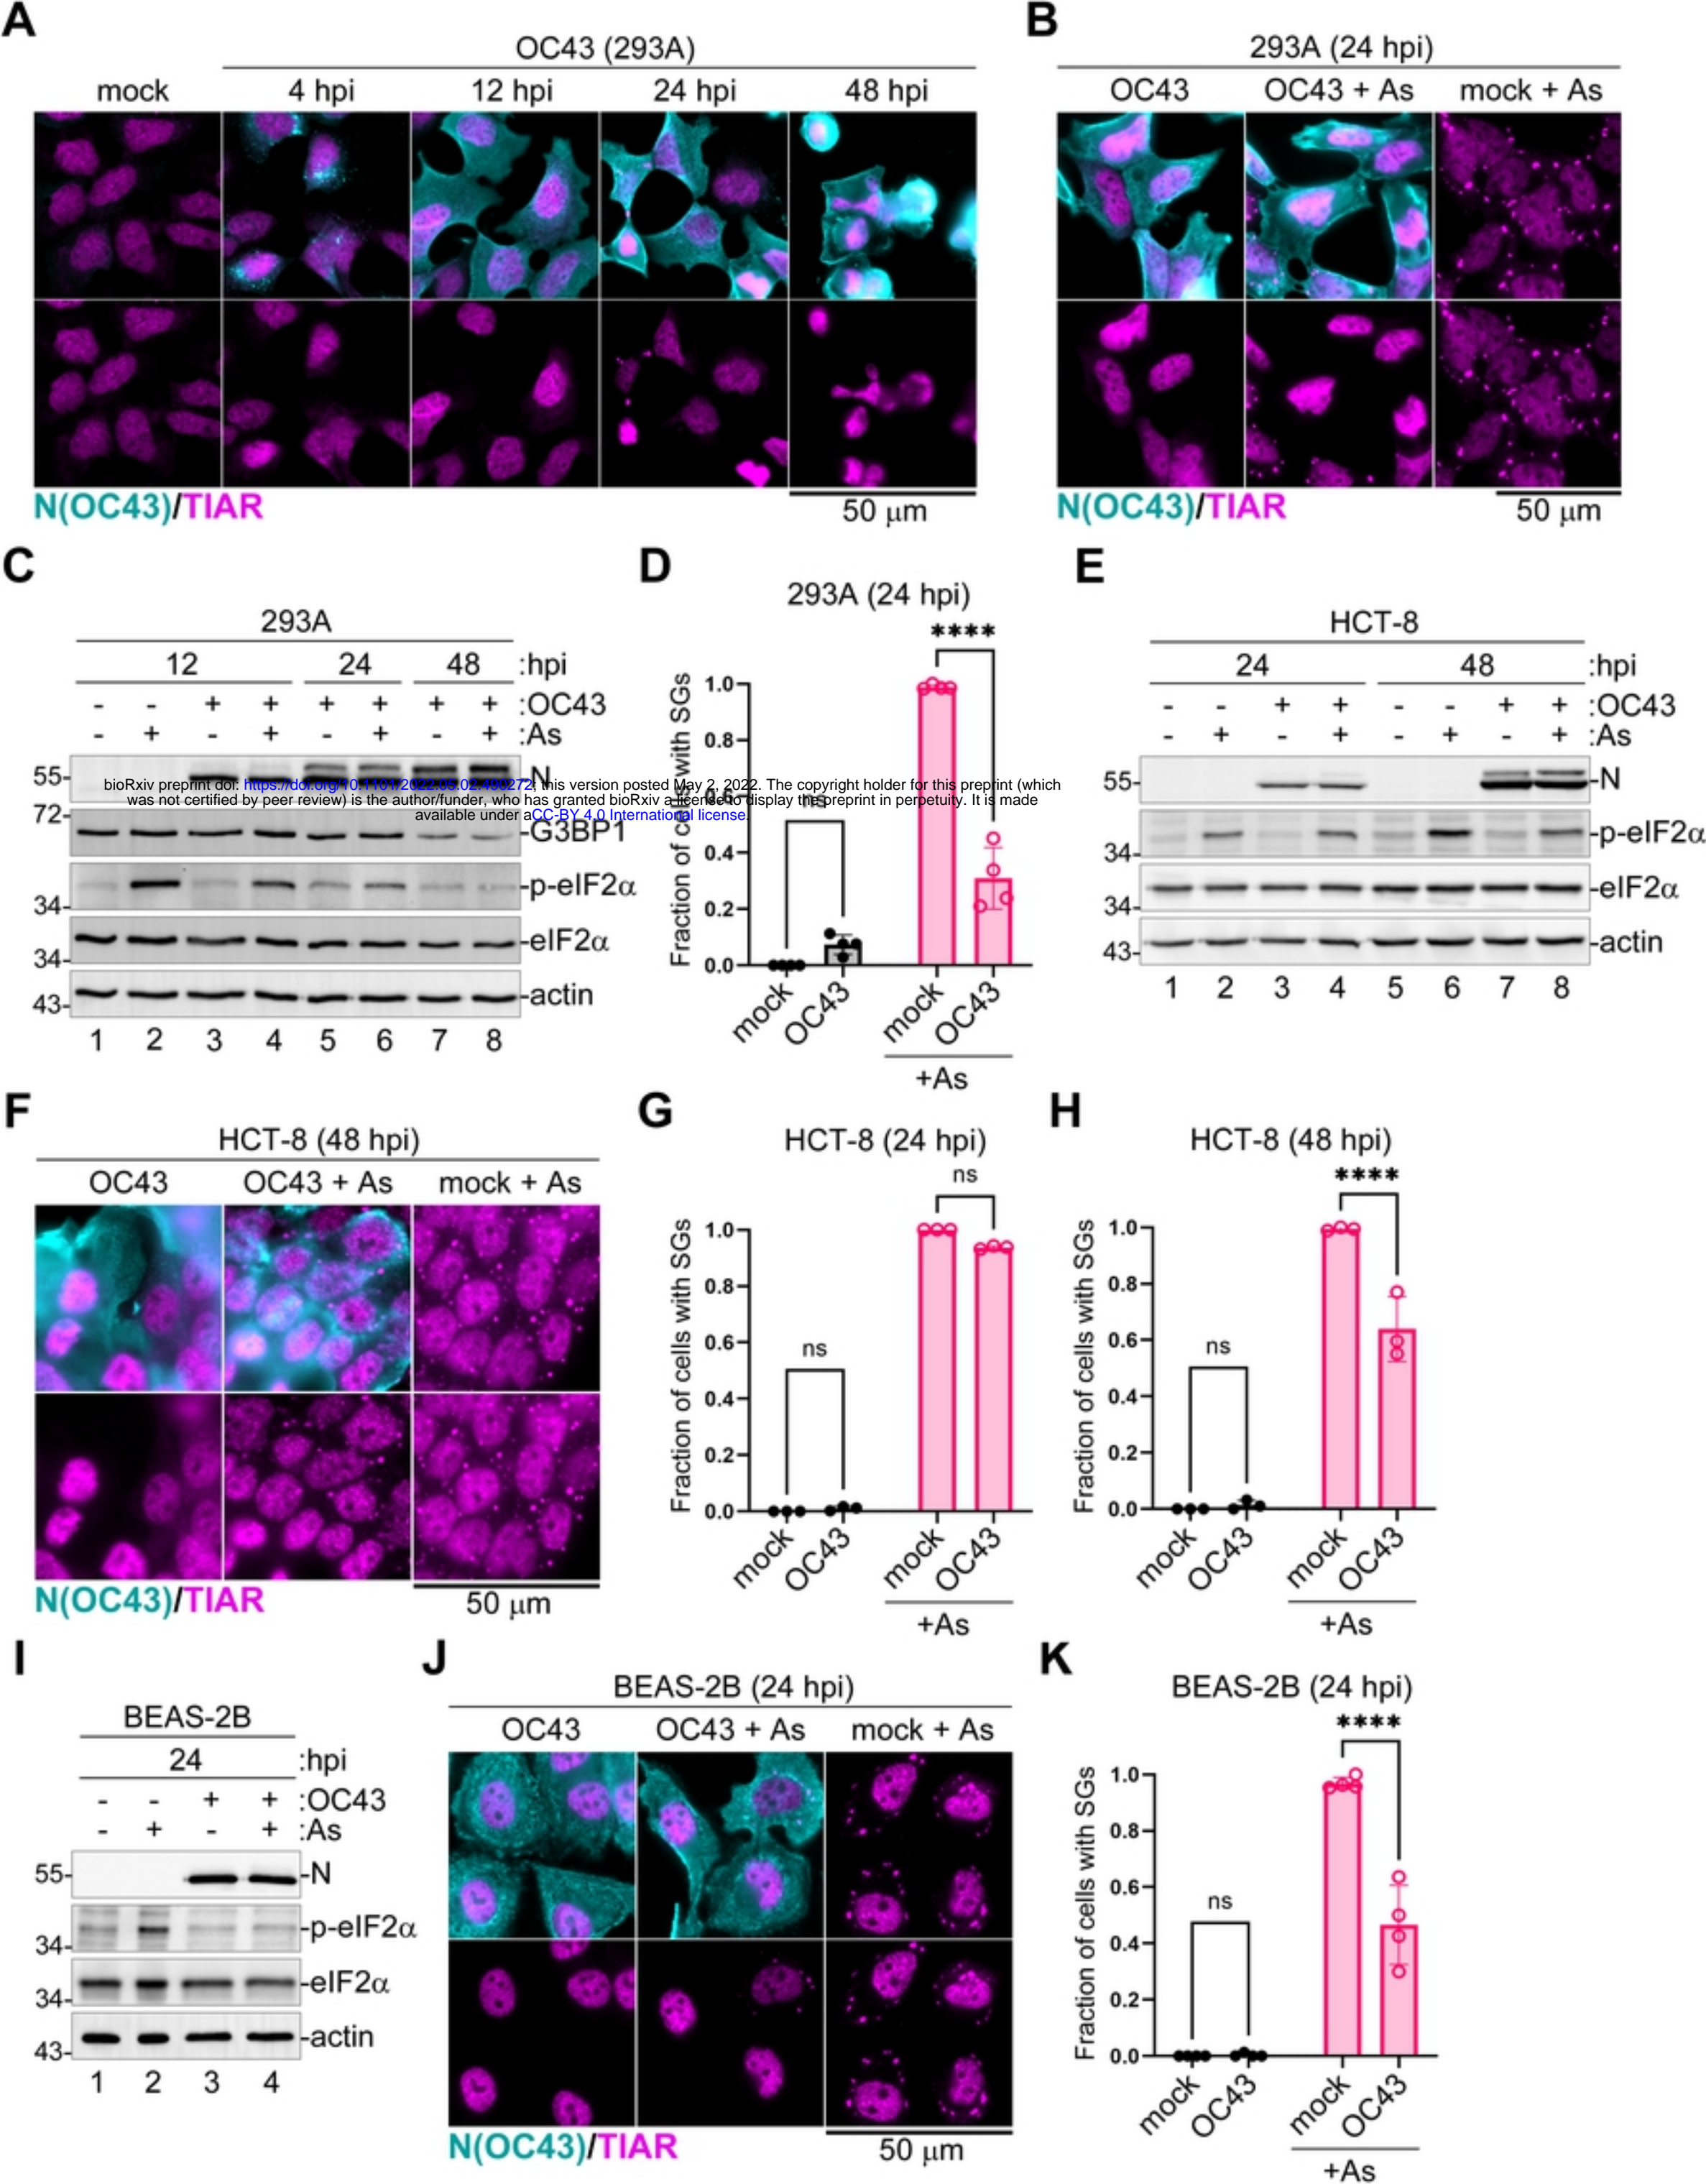



**A**

293A (24 hpi)

OC43      OC43 + Sil.      mock + Sil.

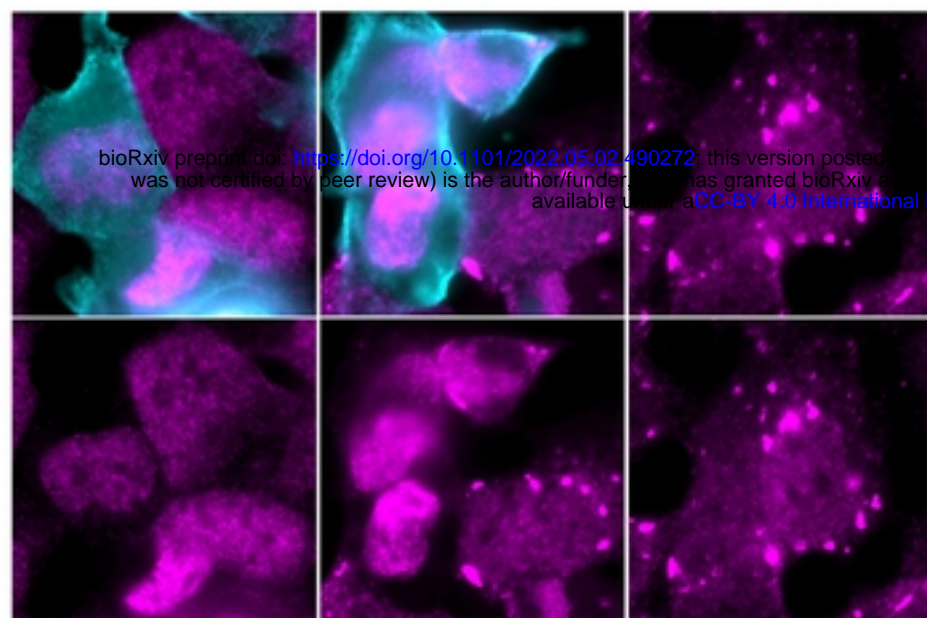**N(OC43)/TIAR**

50 μm

**B**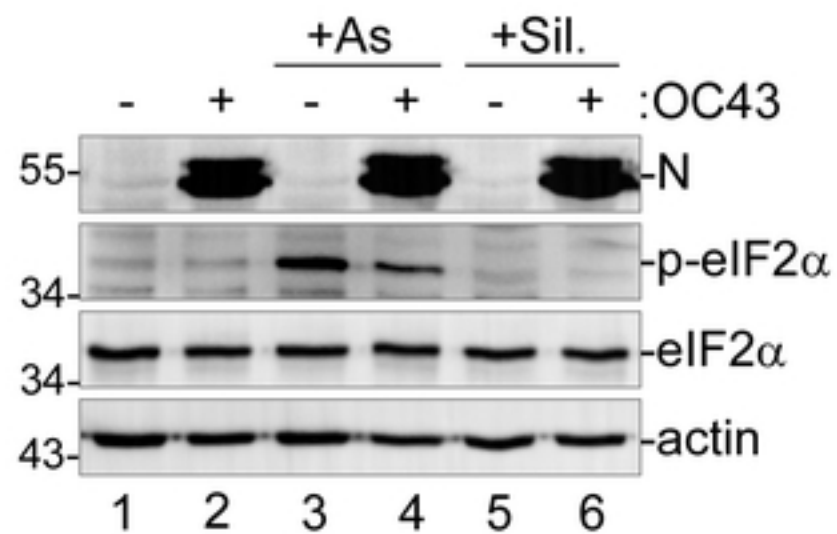**C**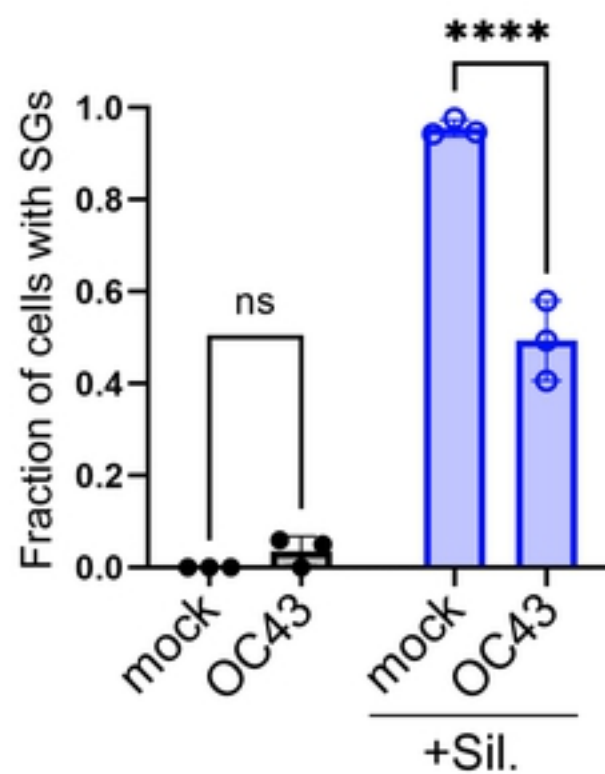**D**

+As

+Sil.

mock      OC43 (24 hpi)      mock      OC43 (24 hpi)

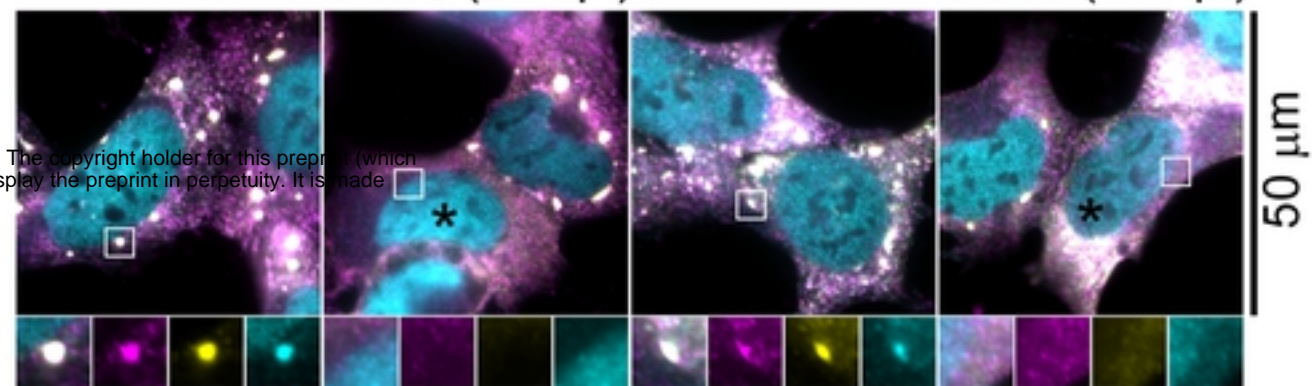**eIF4G/G3BP1/TIA-1**

+As

+Sil.

mock      OC43 (24 hpi)      mock      OC43 (24 hpi)

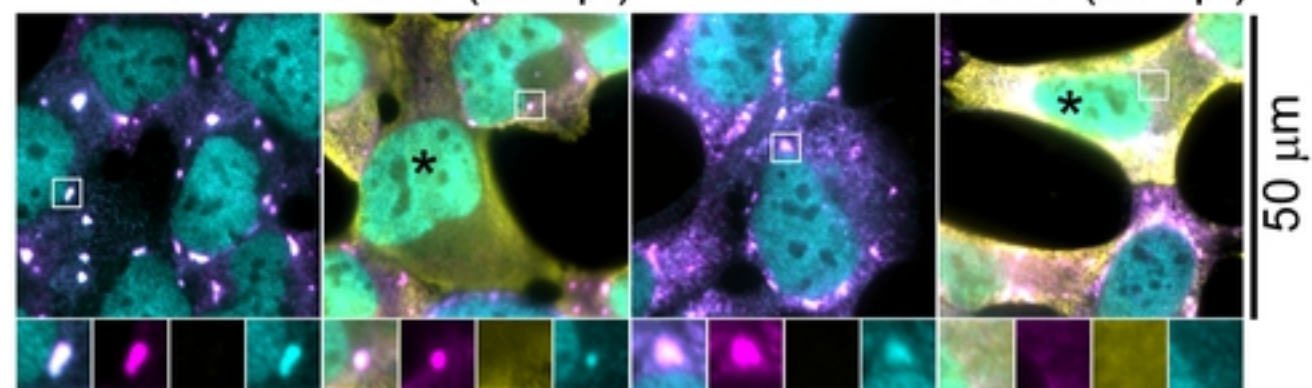**G3BP2/N(OC43)/TIA-1**

+As

+Sil.

mock      OC43 (24 hpi)      mock      OC43 (24 hpi)

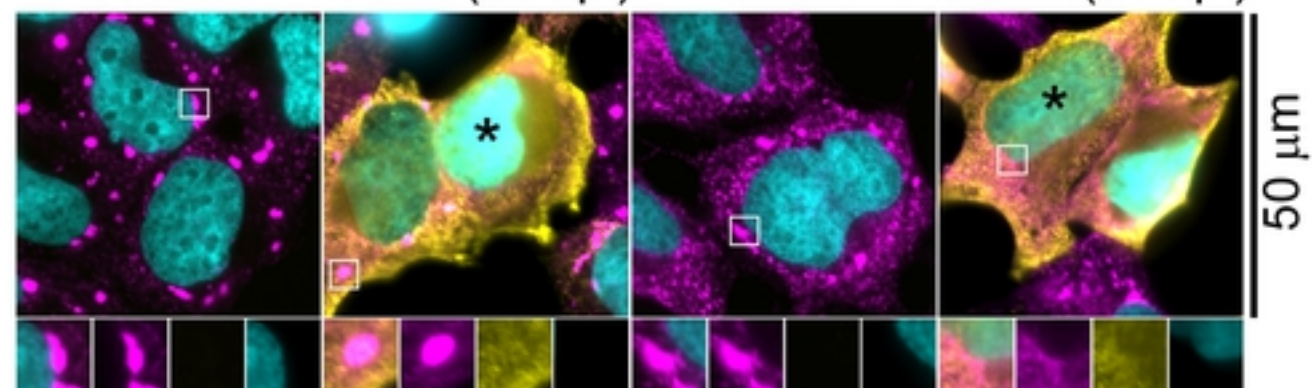**eIF3B/N(OC43)/Hoechst**

2



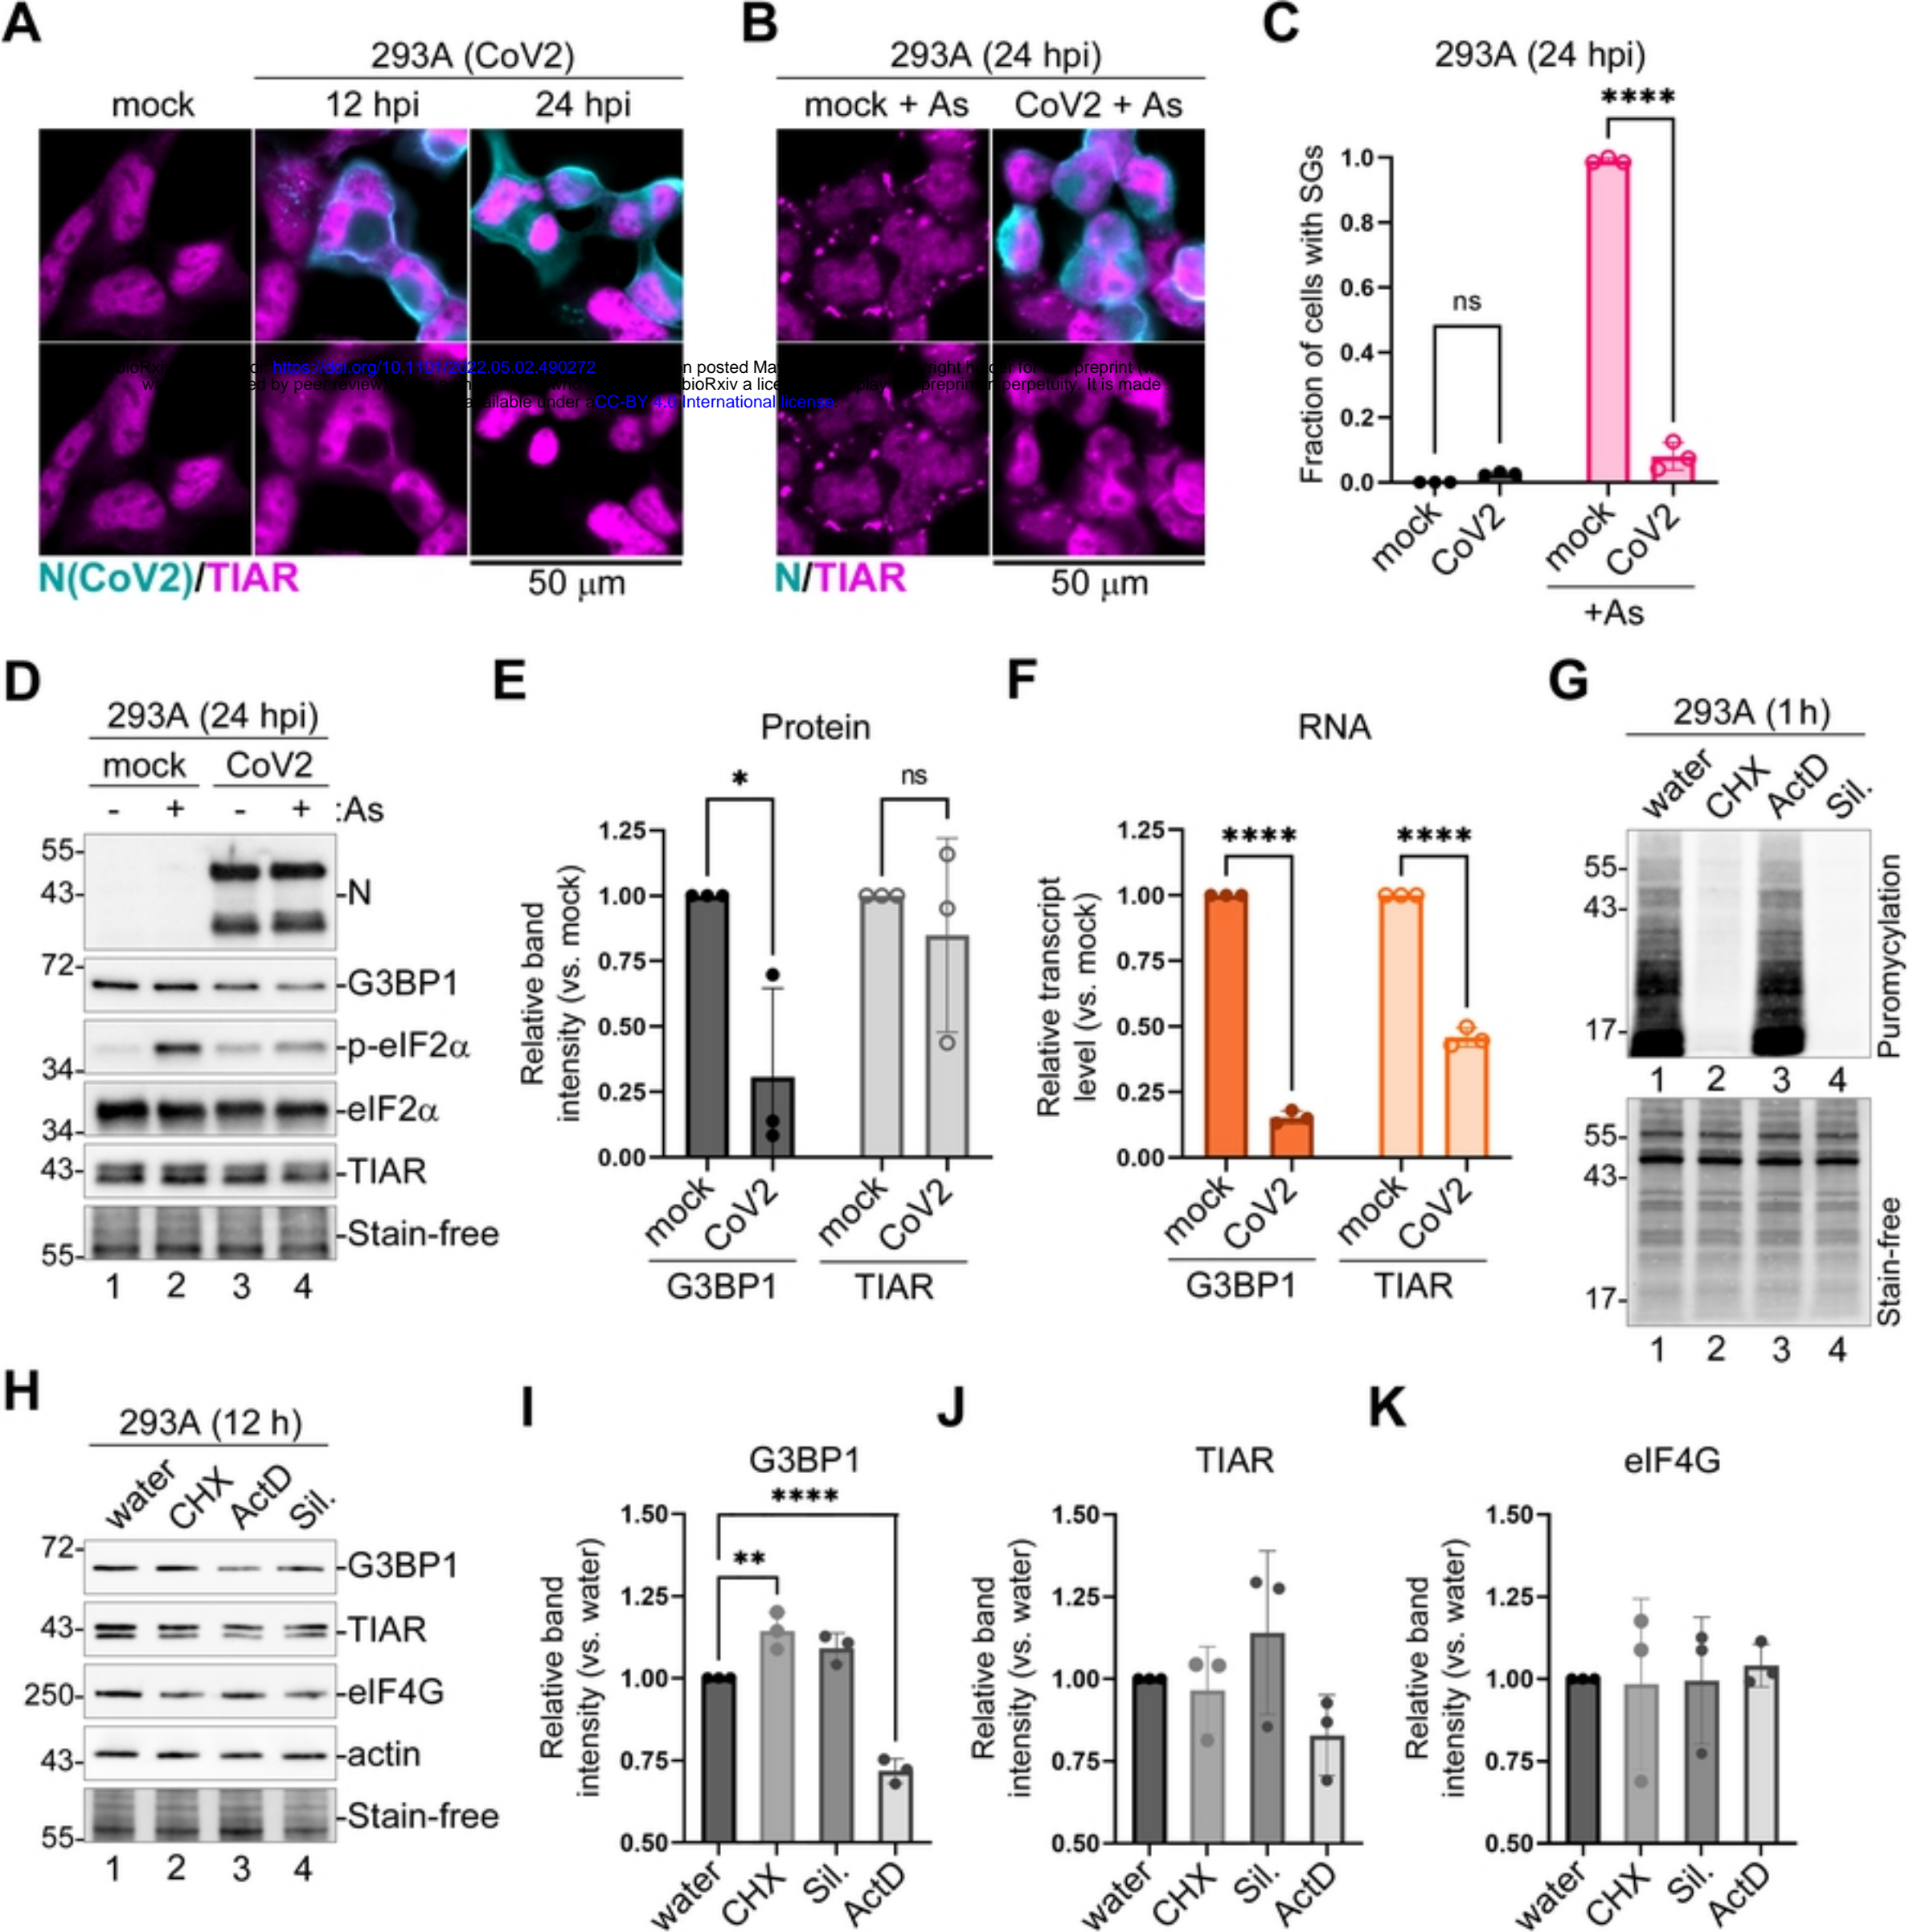

**A**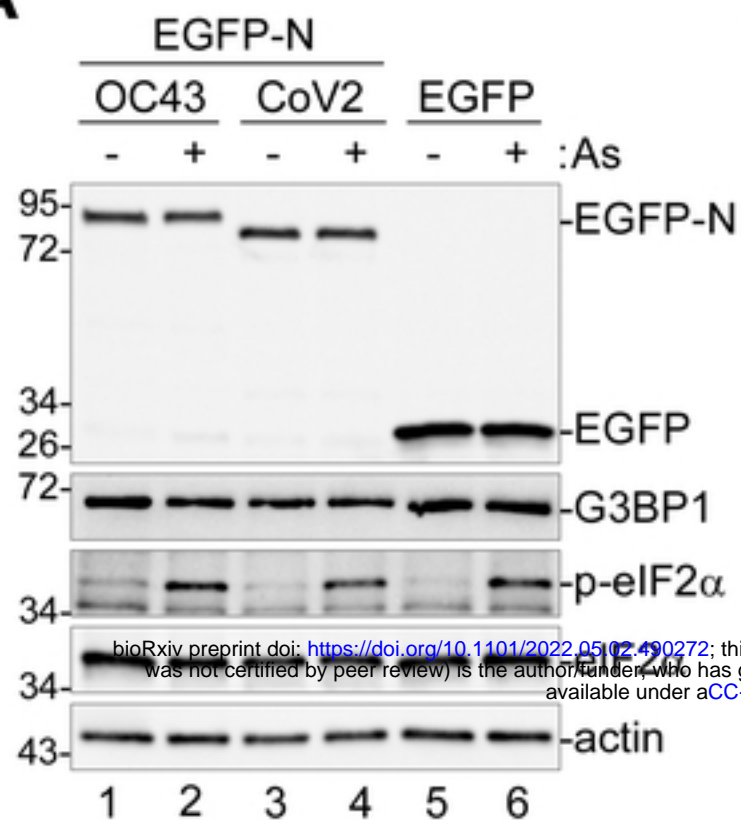**B**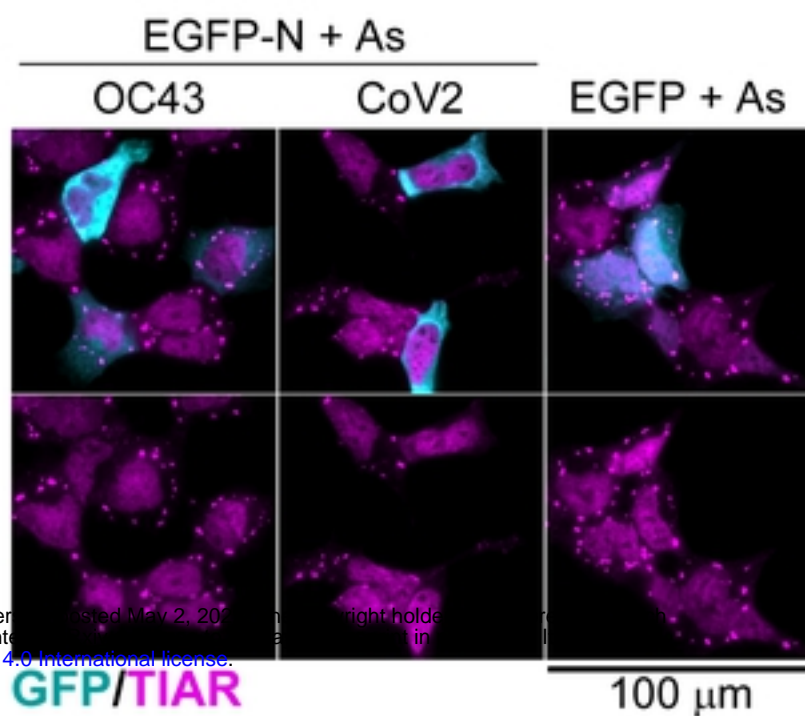**C**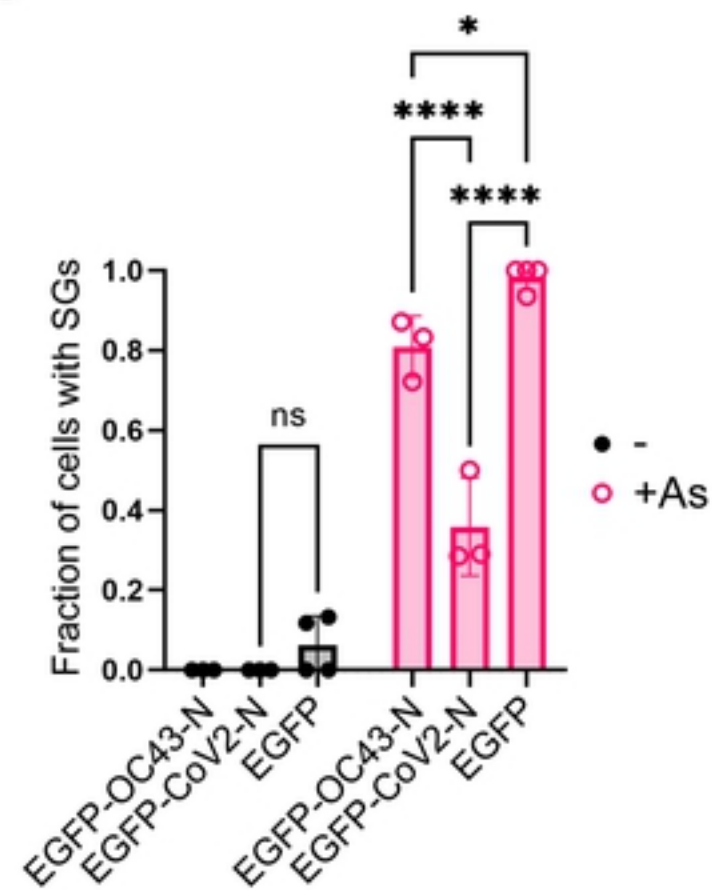**D**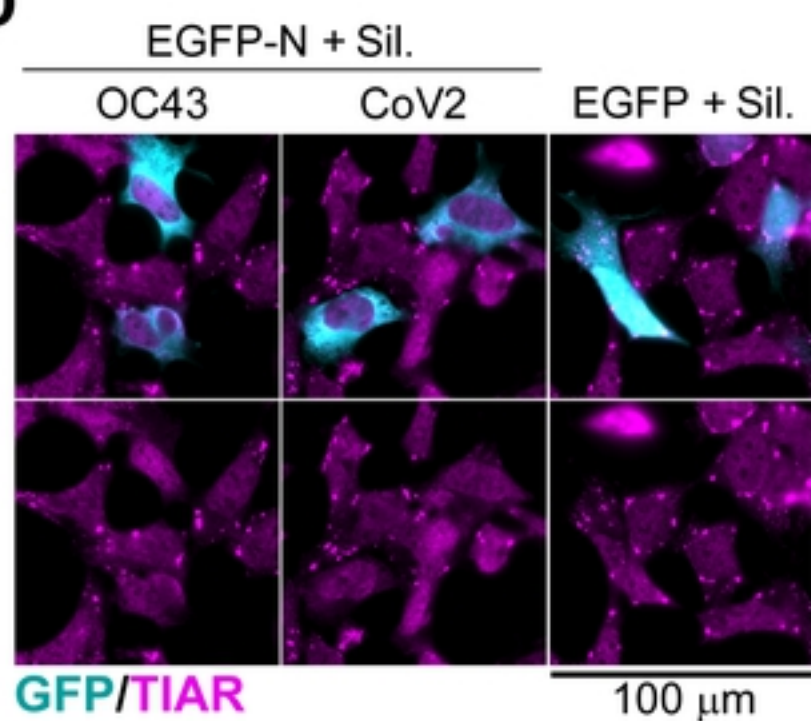**E**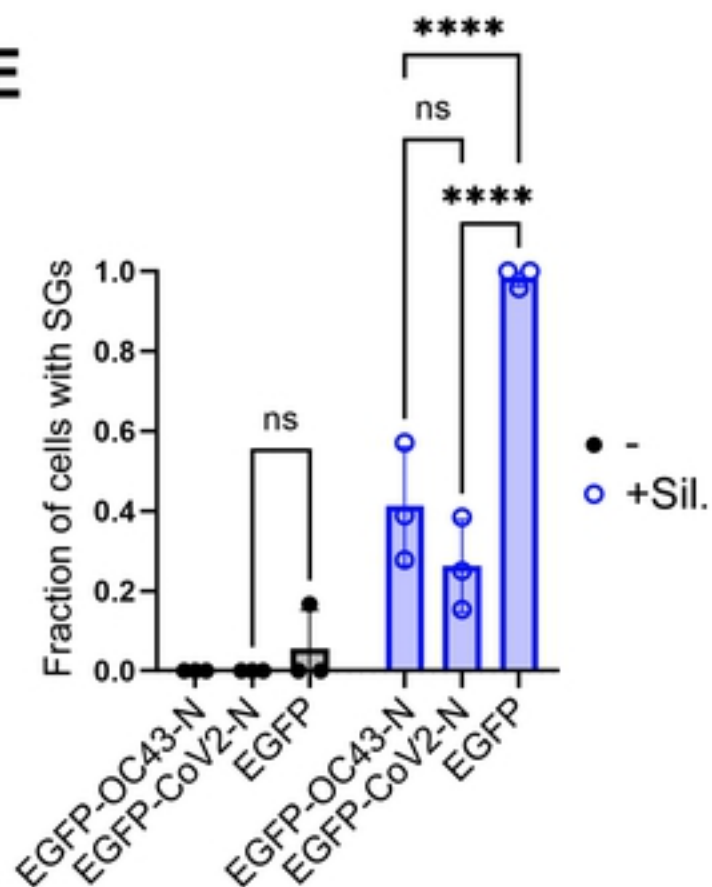**F**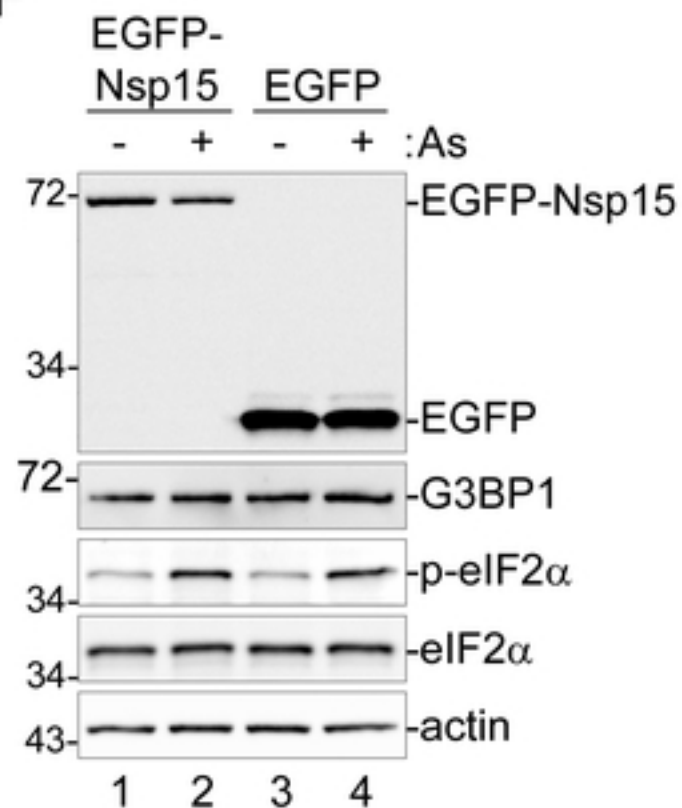**G**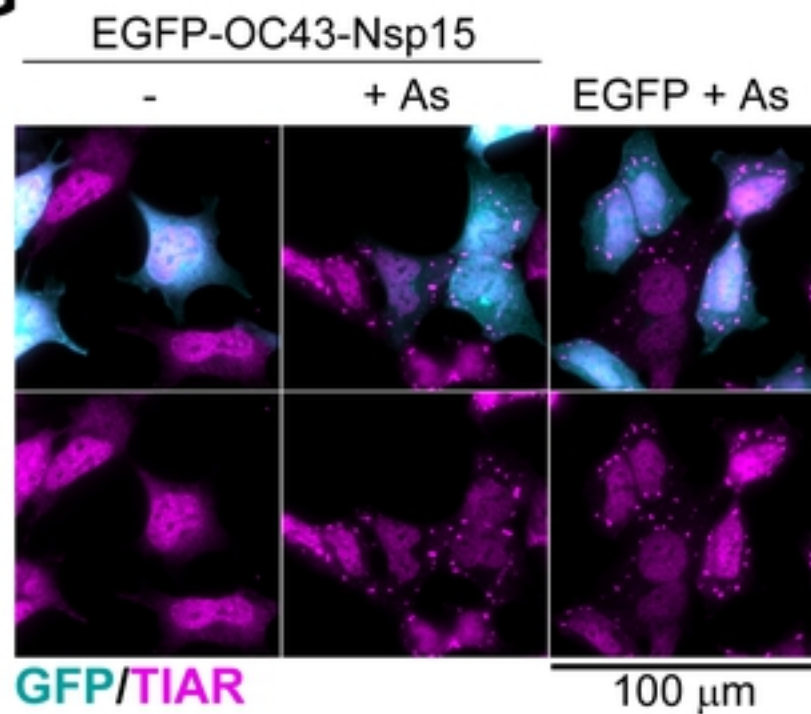**H**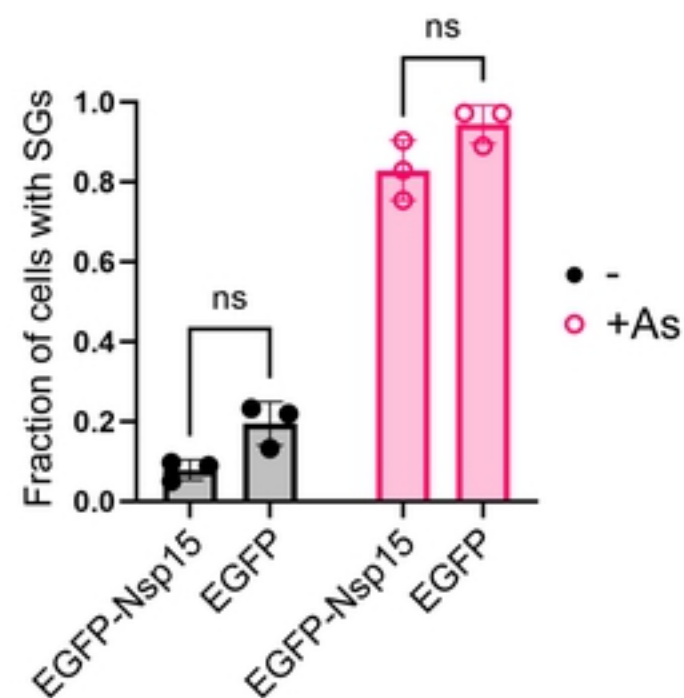



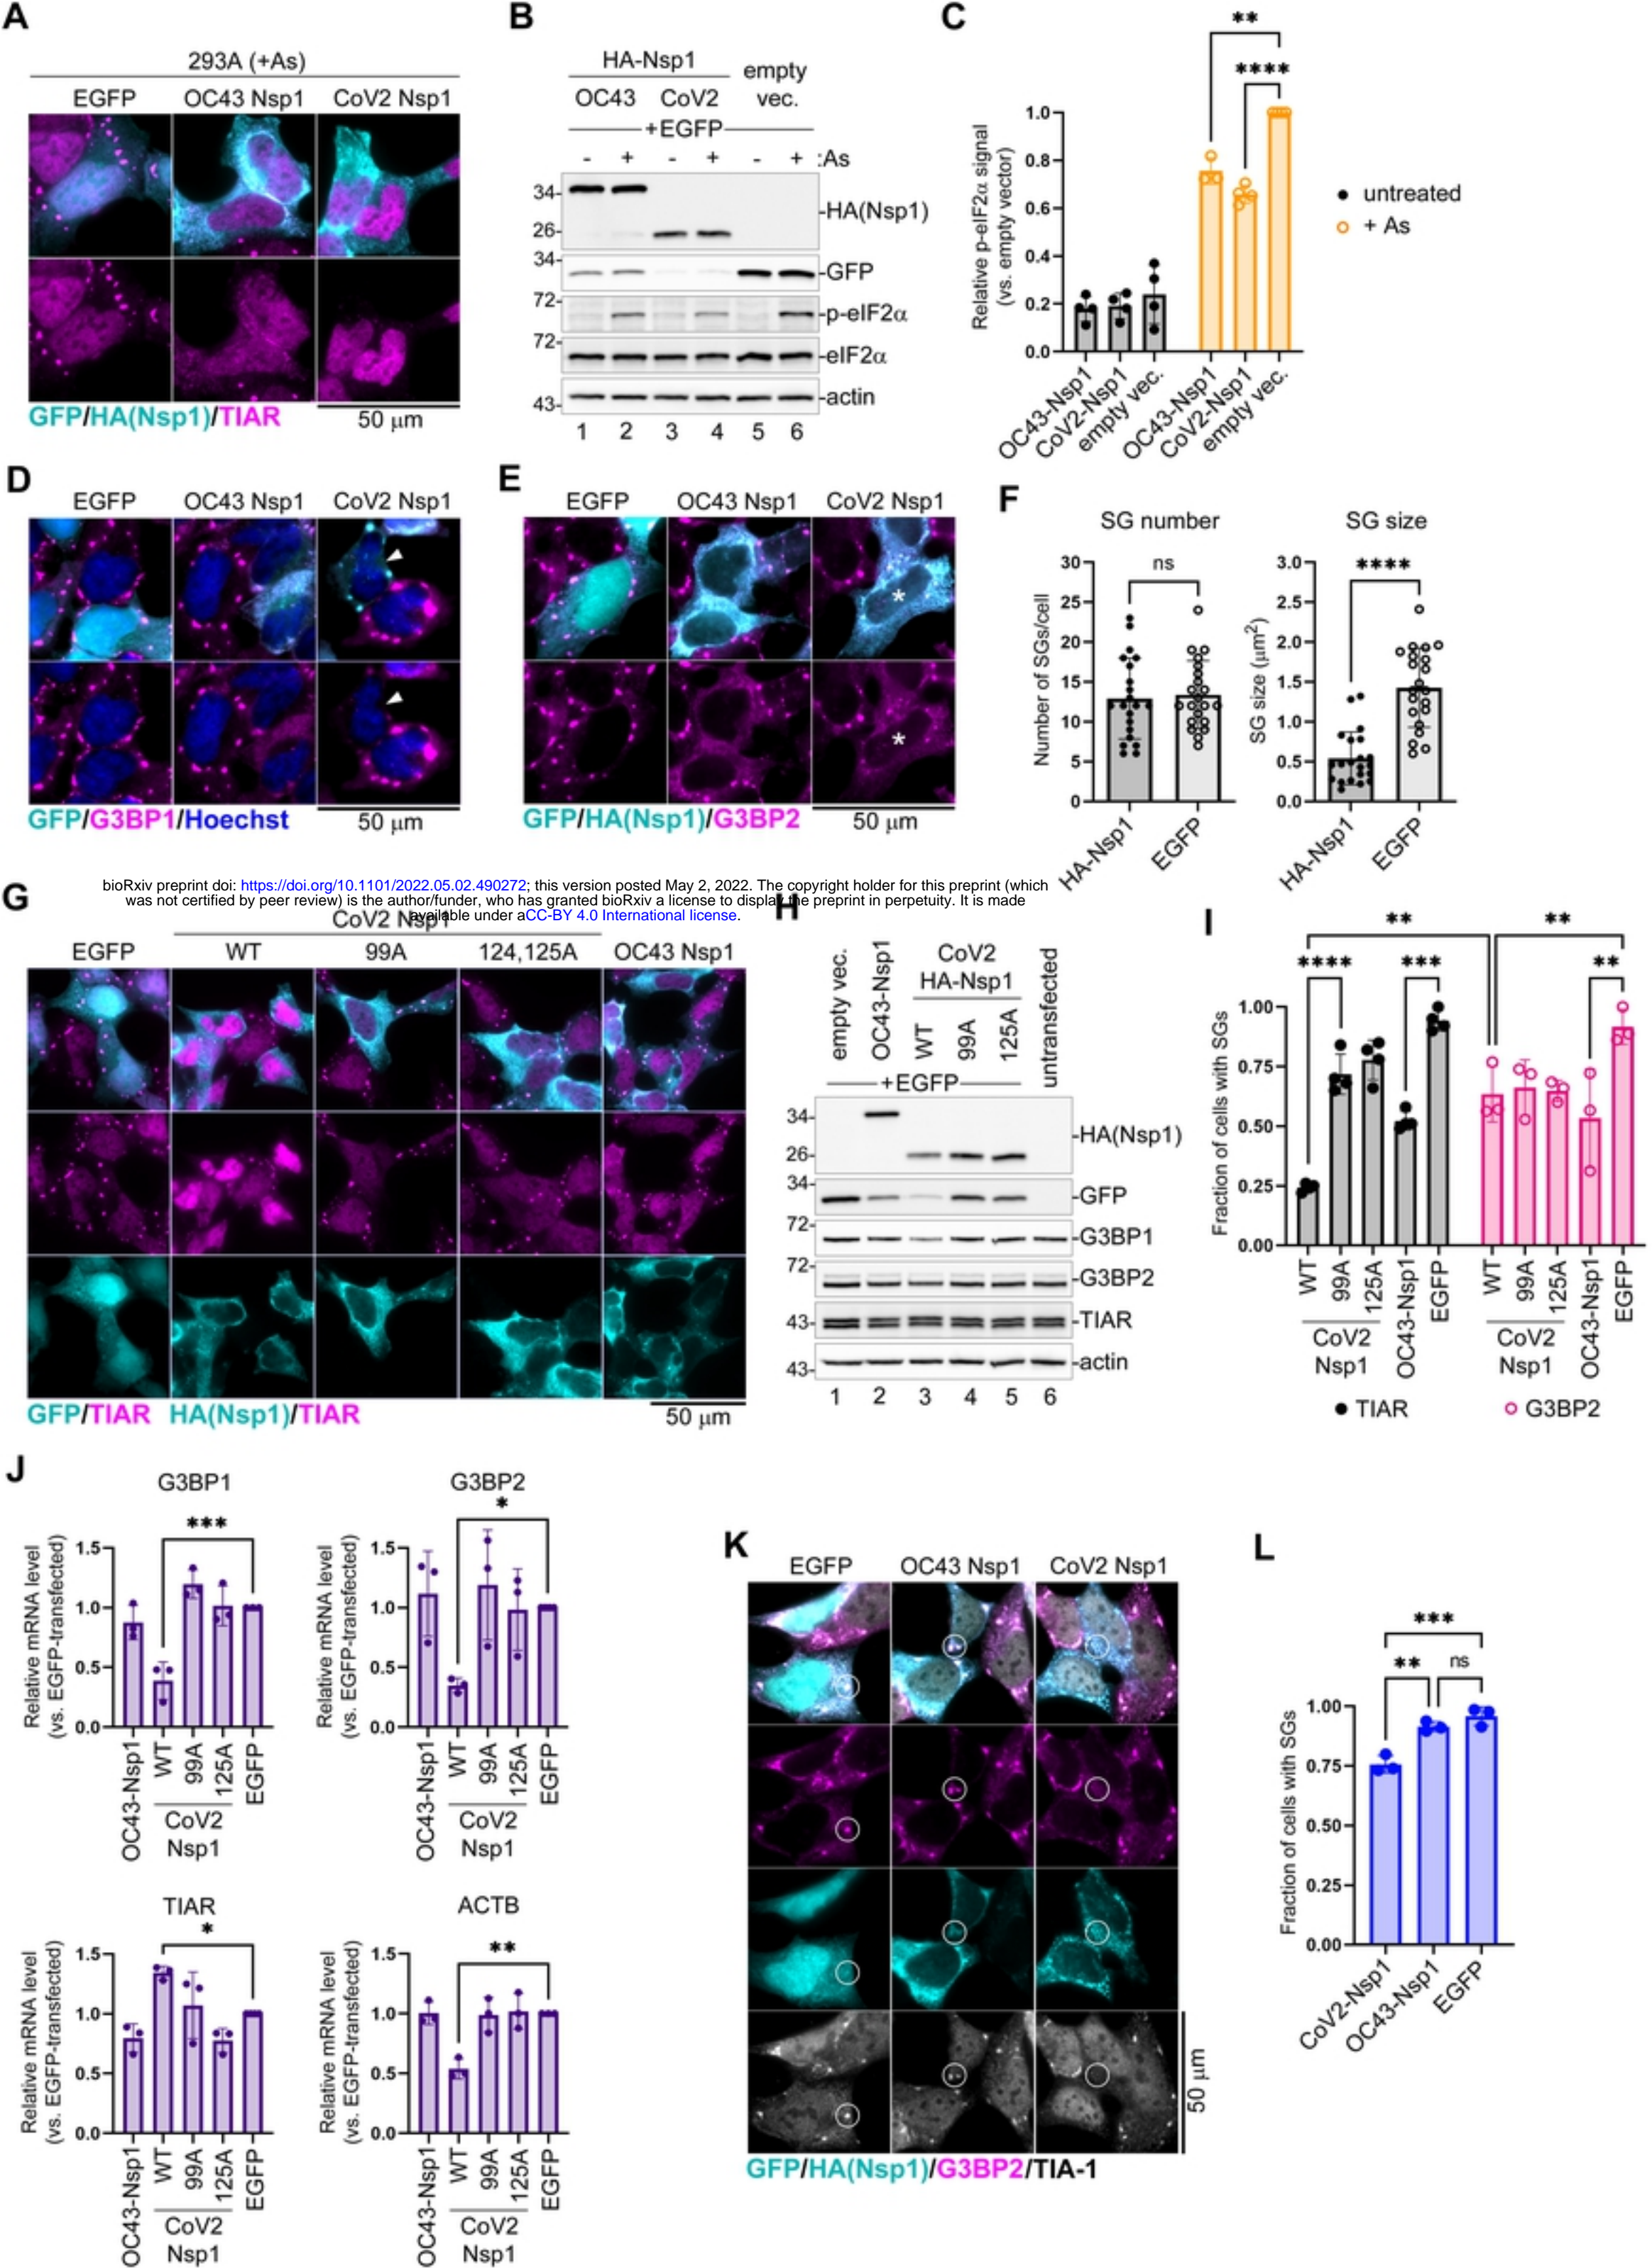



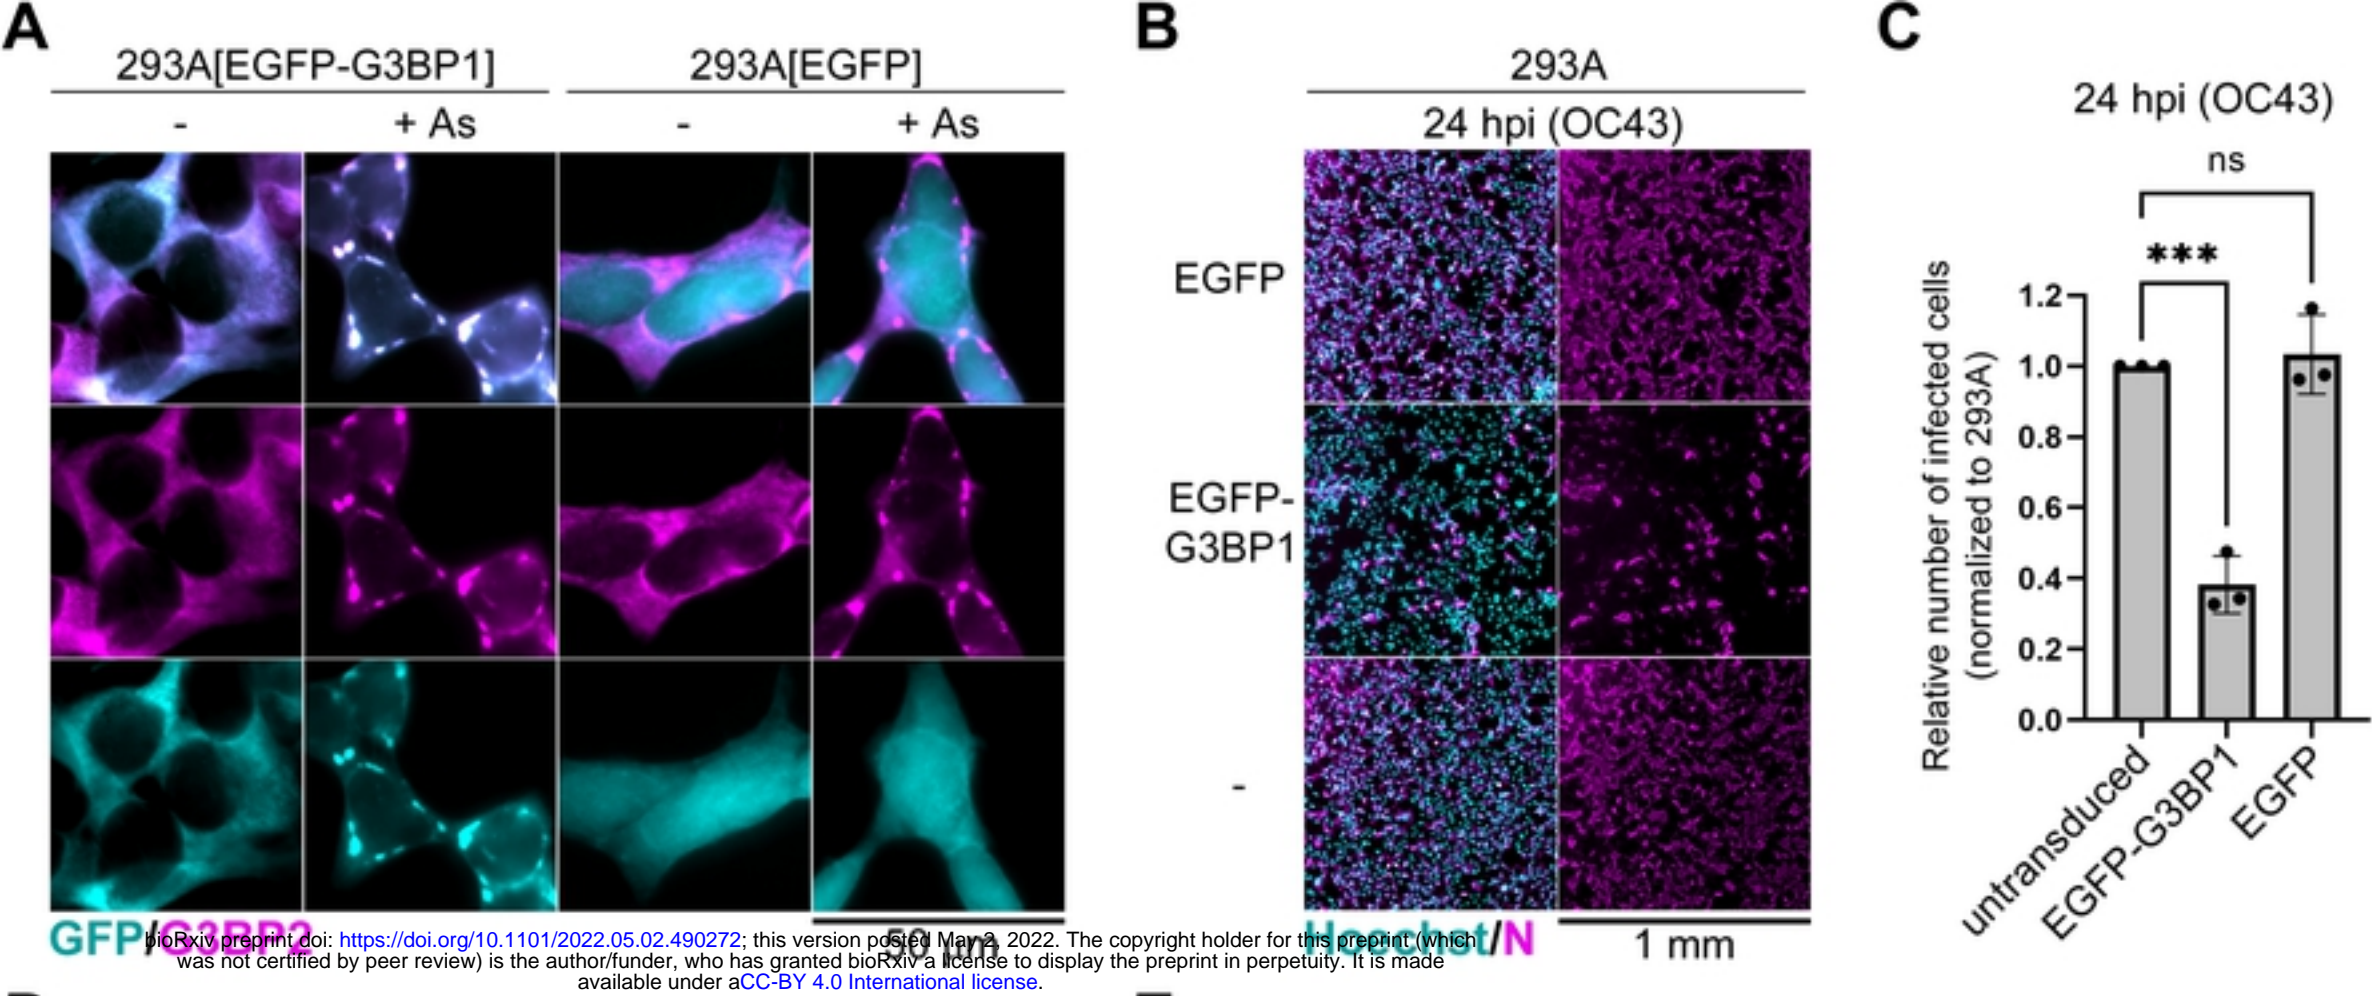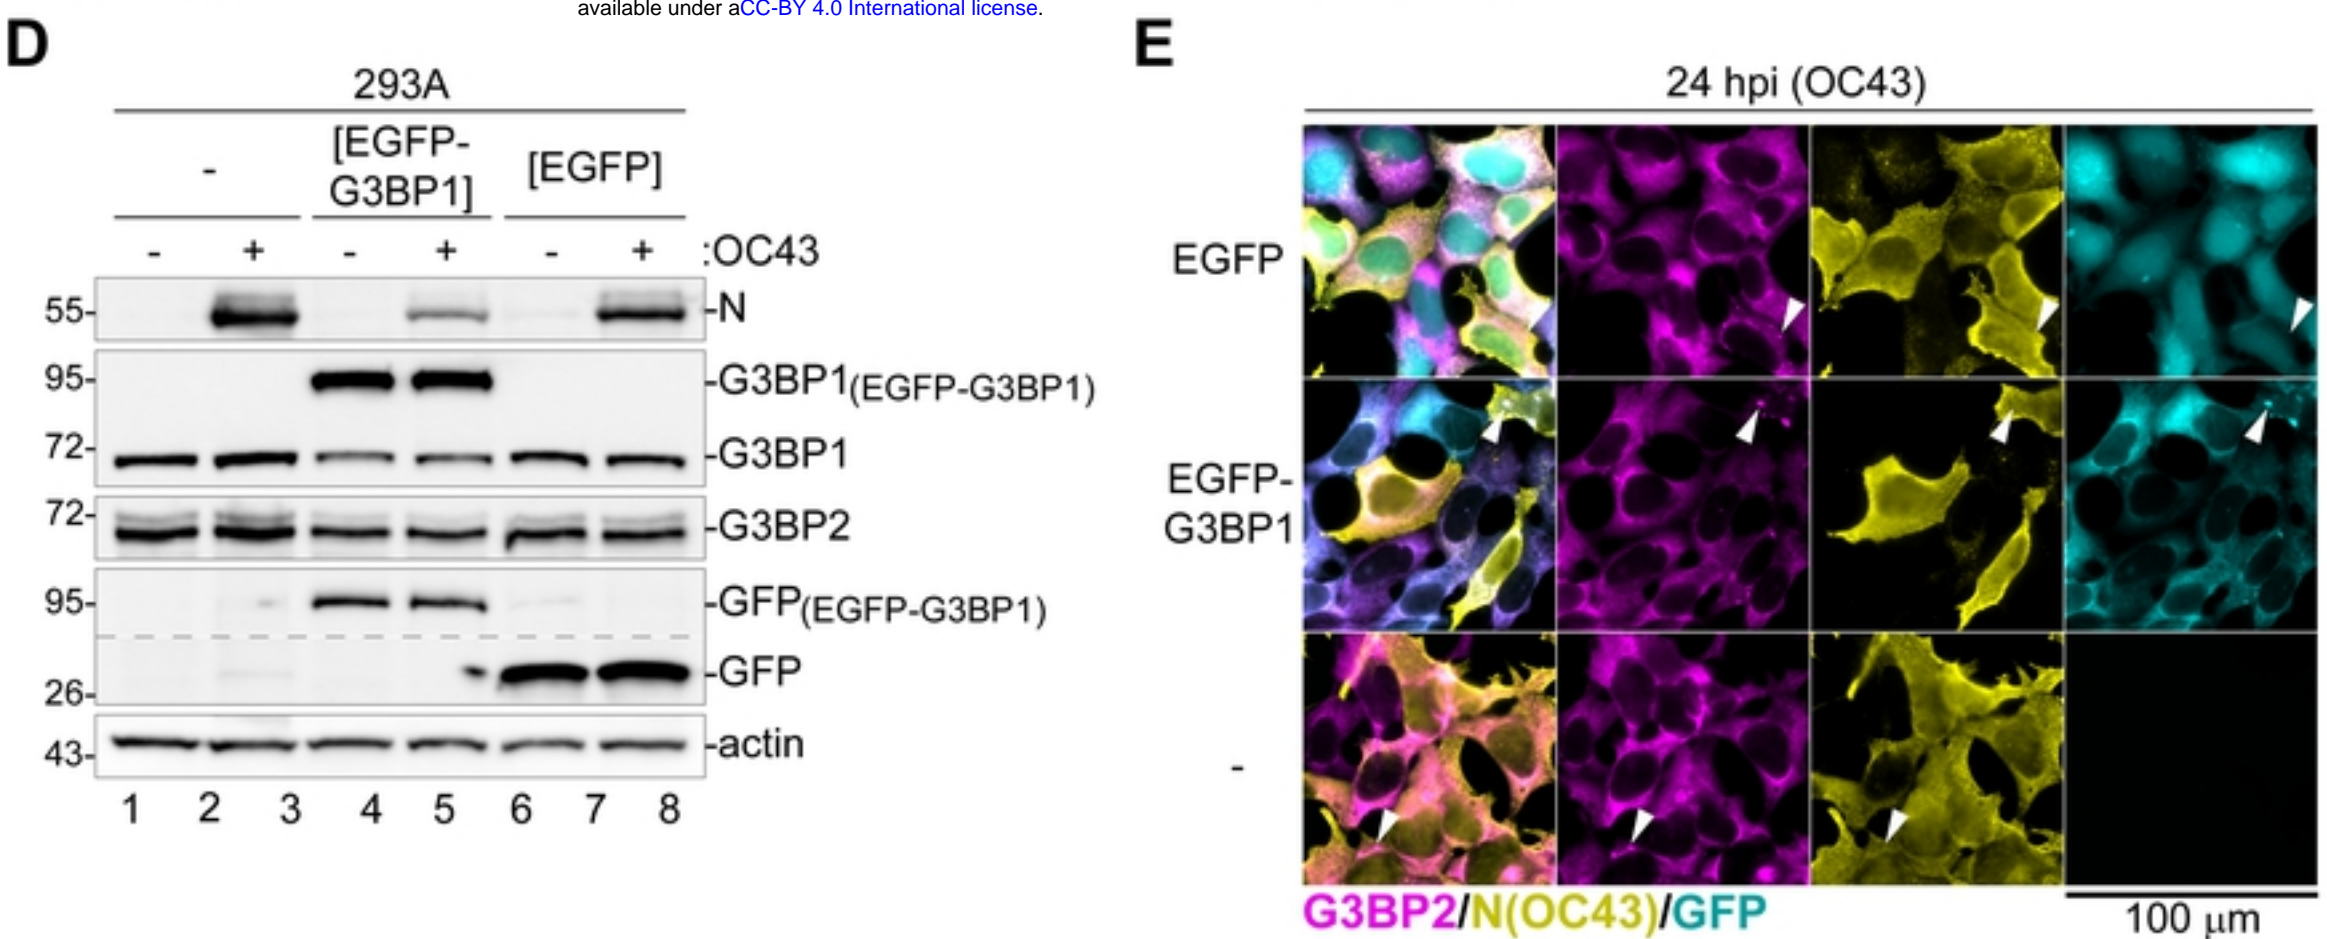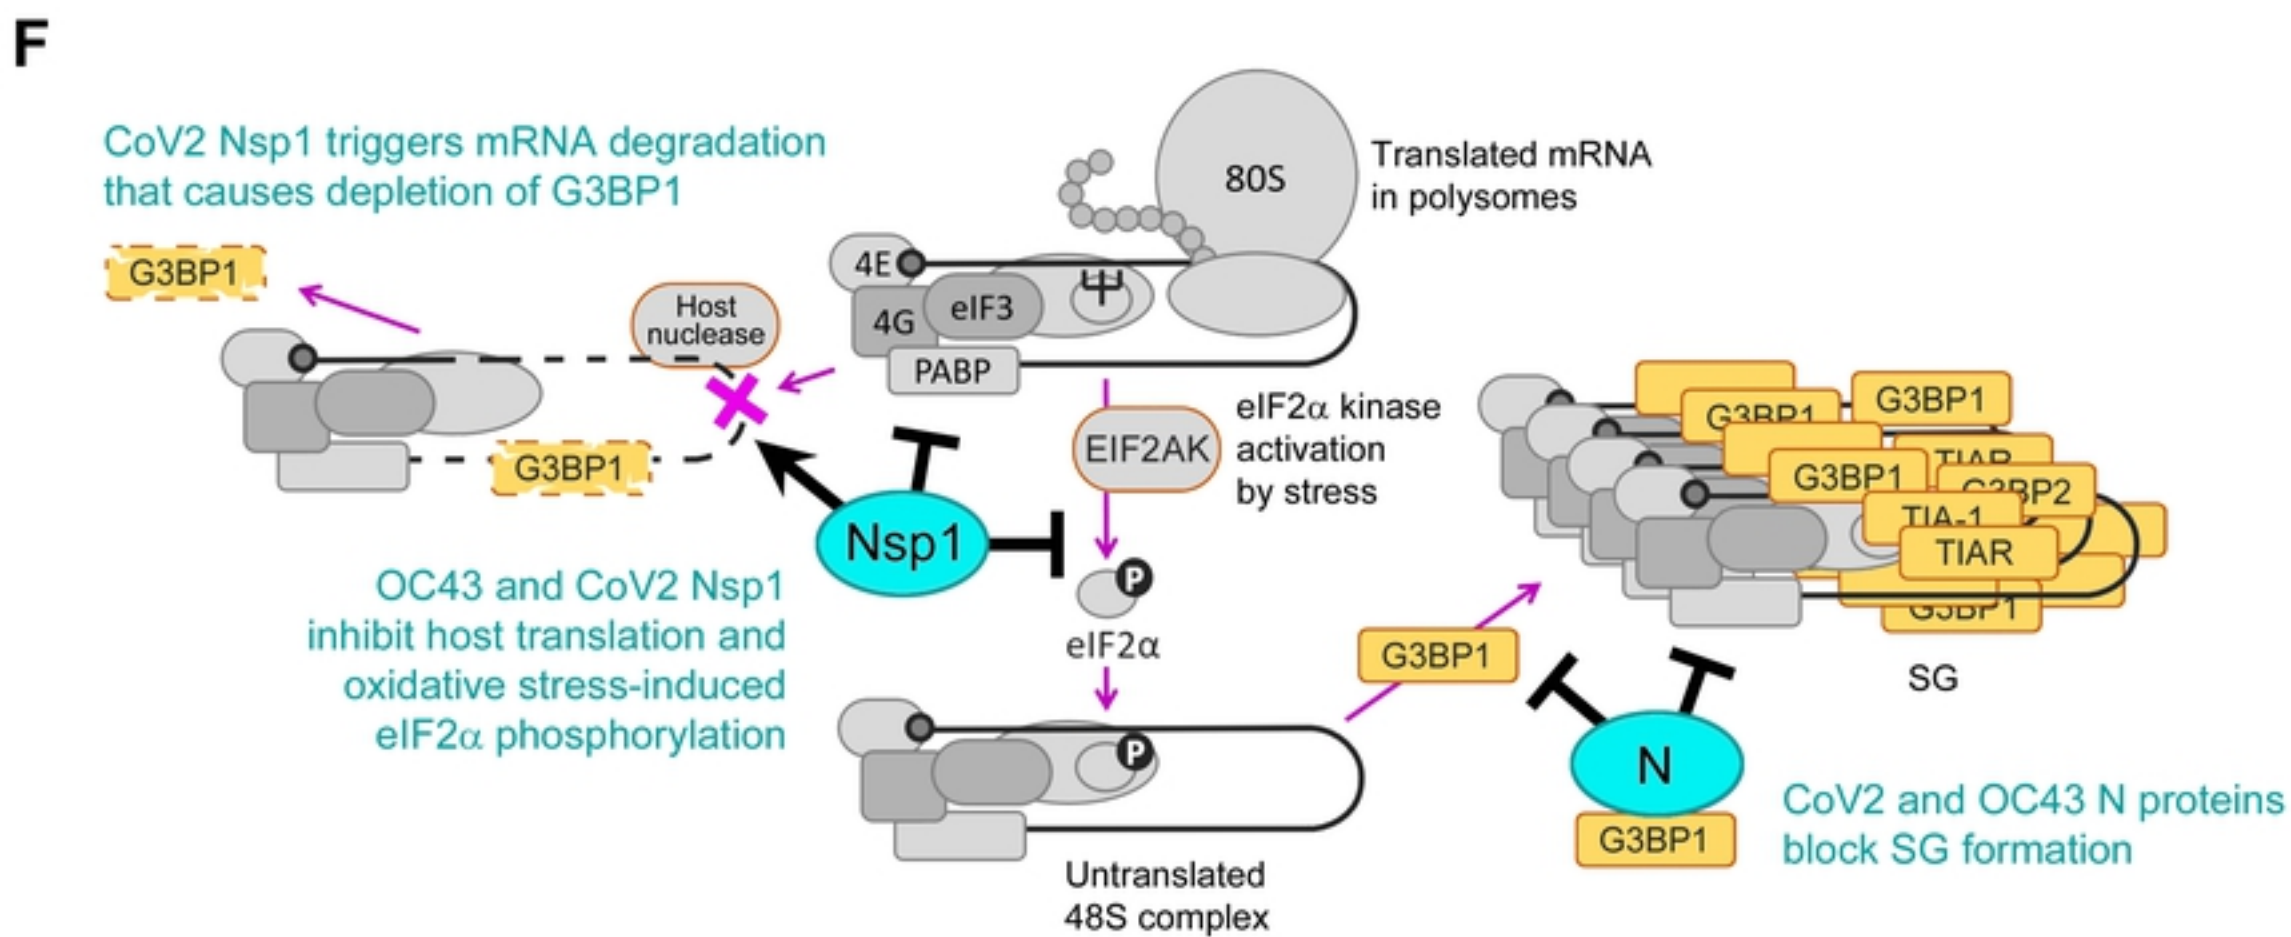

Source: https://www.biorxiv.org/content/10.1101/2022.05.02.490272v1.full.pdf
